# Supplementary material for: A new urinary exosome enrichment method by a combination of ultrafiltration and TiO2 nanoparticles
Source: Royal Society of Chemistry journal article supplement (doi:10.1039/d1ay00102g), 2021-01-01
Supplement: d1ay00102g1.xlsx [file d1ay00102g1.xlsx]

## Sheet: protein groups
Protein IDs
sp|A0AVT1|UBA6_HUMAN
sp|A5D8V7|CC151_HUMAN
sp|A6ND91|ASPD_HUMAN
sp|A6NDG6|PGP_HUMAN
sp|A6NI73|LIRA5_HUMAN
sp|O60309|L37A3_HUMAN;sp|A6NMS7|L37A1_HUMAN;sp|A6NM11|L37A2_HUMAN
sp|A8K2U0|A2ML1_HUMAN
sp|P11488|GNAT1_HUMAN;sp|P19087|GNAT2_HUMAN;sp|A8MTJ3|GNAT3_HUMAN;sp|P63096|GNAI1_HUMAN;sp|P09471|GNAO_HUMAN;sp|P08754|GNAI3_HUMAN;sp|P38405|GNAL_HUMAN
sp|B3EWG6|FM25G_HUMAN;sp|B3EWG5|FM25C_HUMAN;sp|B3EWG4|FM25B_HUMAN;sp|B3EWG3|FM25A_HUMAN
sp|Q99613|EIF3C_HUMAN;sp|B5ME19|EIFCL_HUMAN
sp|B9A064|IGLL5_HUMAN;sp|P0CG04|LAC1_HUMAN
sp|Q13765|NACA_HUMAN;sp|E9PAV3|NACAM_HUMAN
sp|O00115|DNS2A_HUMAN
sp|O00148|DX39A_HUMAN;sp|Q13838|DX39B_HUMAN
sp|O00170|AIP_HUMAN
sp|O00182|LEG9_HUMAN;sp|Q6DKI2|LEG9C_HUMAN;sp|Q3B8N2|LEG9B_HUMAN
sp|O00187|MASP2_HUMAN
sp|O00231|PSD11_HUMAN
sp|O00232|PSD12_HUMAN
sp|O00299|CLIC1_HUMAN
sp|O00303|EIF3F_HUMAN
sp|O00338|ST1C2_HUMAN
sp|O00339|MATN2_HUMAN
sp|O00391|QSOX1_HUMAN
sp|O00401|WASL_HUMAN
sp|O00410|IPO5_HUMAN
sp|O00461|GOLI4_HUMAN
sp|O00468|AGRIN_HUMAN
sp|O00469|PLOD2_HUMAN
sp|O00487|PSDE_HUMAN
sp|O00499|BIN1_HUMAN;sp|Q9UBW5|BIN2_HUMAN;sp|P49418|AMPH_HUMAN
sp|O00505|IMA4_HUMAN;sp|O00629|IMA3_HUMAN
sp|O00533|NCHL1_HUMAN
sp|O00534|VMA5A_HUMAN
sp|O00560|SDCB1_HUMAN
sp|O00584|RNT2_HUMAN
sp|O00592|PODXL_HUMAN
sp|O00754|MA2B1_HUMAN
sp|O00757|F16P2_HUMAN
sp|O00764|PDXK_HUMAN
sp|O14498|ISLR_HUMAN
sp|O14594|NCAN_HUMAN
sp|O14656|TOR1A_HUMAN
sp|O14672|ADA10_HUMAN
sp|O14732|IMPA2_HUMAN
sp|O14744|ANM5_HUMAN
sp|O14745|NHRF1_HUMAN
sp|O14773|TPP1_HUMAN
sp|O14786|NRP1_HUMAN
sp|O14791|APOL1_HUMAN
sp|O14818|PSA7_HUMAN;sp|Q8TAA3|PSA7L_HUMAN
sp|O14841|OPLA_HUMAN
sp|P19105|ML12A_HUMAN;sp|O14950|ML12B_HUMAN;sp|P24844|MYL9_HUMAN
sp|O14964|HGS_HUMAN
sp|O15020|SPTN2_HUMAN
sp|O15143|ARC1B_HUMAN
sp|O15144|ARPC2_HUMAN
sp|O15145|ARPC3_HUMAN
sp|O15197|EPHB6_HUMAN
sp|O15230|LAMA5_HUMAN
sp|O15305|PMM2_HUMAN;sp|Q92871|PMM1_HUMAN
sp|O15371|EIF3D_HUMAN
sp|O15393|TMPS2_HUMAN
sp|O15511|ARPC5_HUMAN
sp|O43147|SGSM2_HUMAN
sp|O43150|ASAP2_HUMAN
sp|O43155|FLRT2_HUMAN
sp|O43175|SERA_HUMAN
sp|O43240|KLK10_HUMAN
sp|O43242|PSMD3_HUMAN
sp|O43301|HS12A_HUMAN;sp|Q96MM6|HS12B_HUMAN
sp|O43312|MTSS1_HUMAN
sp|O43324|MCA3_HUMAN
sp|O43390|HNRPR_HUMAN
sp|O43451|MGA_HUMAN;sp|Q2M2H8|MGAL_HUMAN
sp|O43488|ARK72_HUMAN
sp|O43490|PROM1_HUMAN
sp|O43505|B4GA1_HUMAN
sp|O43508|TNF12_HUMAN
sp|O43567|RNF13_HUMAN
sp|O43570|CAH12_HUMAN
sp|O43598|DNPH1_HUMAN
sp|O43681|ASNA_HUMAN
sp|O43707|ACTN4_HUMAN;sp|P35609|ACTN2_HUMAN;sp|Q08043|ACTN3_HUMAN
sp|O43747|AP1G1_HUMAN
sp|O43776|SYNC_HUMAN
sp|O43813|LANC1_HUMAN
sp|O43854|EDIL3_HUMAN
sp|O43865|SAHH2_HUMAN;sp|Q96HN2|SAHH3_HUMAN
sp|O43866|CD5L_HUMAN
sp|O43895|XPP2_HUMAN
sp|O60218|AK1BA_HUMAN
sp|O60235|TM11D_HUMAN
sp|O60271|JIP4_HUMAN;sp|Q9UPT6|JIP3_HUMAN
sp|O60361|NDK8_HUMAN
sp|O60437|PEPL_HUMAN
sp|O60449|LY75_HUMAN
sp|O60462|NRP2_HUMAN
sp|O60476|MA1A2_HUMAN
sp|O60494|CUBN_HUMAN
sp|O60506|HNRPQ_HUMAN
sp|O60512|B4GT3_HUMAN
sp|O60513|B4GT4_HUMAN
sp|O60547|GMDS_HUMAN
sp|O60568|PLOD3_HUMAN
sp|O60603|TLR2_HUMAN
sp|O60610|DIAP1_HUMAN
sp|O60613|SEP15_HUMAN
sp|O60635|TSN1_HUMAN
sp|O60701|UGDH_HUMAN
sp|O60704|TPST2_HUMAN
sp|P41567|EIF1_HUMAN;sp|O60739|EIF1B_HUMAN
sp|O60749|SNX2_HUMAN
sp|O60763|USO1_HUMAN
sp|Q99880|H2B1L_HUMAN;sp|Q99879|H2B1M_HUMAN;sp|Q99877|H2B1N_HUMAN;sp|Q93079|H2B1H_HUMAN;sp|Q5QNW6|H2B2F_HUMAN;sp|P62807|H2B1C_HUMAN;sp|P58876|H2B1D_HUMAN;sp|P57053|H2BFS_HUMAN;sp|O60814|H2B1K_HUMAN;sp|Q96A08|H2B1A_HUMAN
sp|O60825|F262_HUMAN
sp|O60879|DIAP2_HUMAN
sp|O60884|DNJA2_HUMAN
sp|O60888|CUTA_HUMAN
sp|O60911|CATL2_HUMAN
sp|O75083|WDR1_HUMAN
sp|O75131|CPNE3_HUMAN;sp|Q96FN4|CPNE2_HUMAN;sp|Q8IYJ1|CPNE9_HUMAN;sp|Q96A23|CPNE4_HUMAN;sp|O95741|CPNE6_HUMAN;sp|Q86YQ8|CPNE8_HUMAN;sp|Q9UBL6|CPNE7_HUMAN
sp|O75144|ICOSL_HUMAN
sp|O75153|CLU_HUMAN
sp|O75191|XYLB_HUMAN
sp|O75309|CAD16_HUMAN
sp|O75326|SEM7A_HUMAN
sp|O75340|PDCD6_HUMAN
sp|O75348|VATG1_HUMAN;sp|O95670|VATG2_HUMAN
sp|O75351|VPS4B_HUMAN;sp|Q6PIW4|FIGL1_HUMAN
sp|O75354|ENTP6_HUMAN
sp|O75356|ENTP5_HUMAN
sp|O75367|H2AY_HUMAN;sp|Q9P0M6|H2AW_HUMAN
sp|O75369|FLNB_HUMAN
sp|O75390|CISY_HUMAN
sp|O75436|VP26A_HUMAN
sp|O75487|GPC4_HUMAN;sp|Q9Y625|GPC6_HUMAN
sp|O75493|CAH11_HUMAN
sp|O75503|CLN5_HUMAN
sp|O75531|BAF_HUMAN
sp|O75534|CSDE1_HUMAN
sp|O75594|PGRP1_HUMAN
sp|O75629|CREG1_HUMAN
sp|O75635|SPB7_HUMAN
sp|O75663|TIPRL_HUMAN
sp|O75674|TM1L1_HUMAN
sp|O75752|B3GL1_HUMAN
sp|O75787|RENR_HUMAN
sp|O75821|EIF3G_HUMAN
sp|O75822|EIF3J_HUMAN
sp|O75828|CBR3_HUMAN
sp|O75874|IDHC_HUMAN
sp|O75882|ATRN_HUMAN
sp|O75888|TNF13_HUMAN
sp|O75891|AL1L1_HUMAN;sp|Q3SY69|AL1L2_HUMAN
sp|O75936|BODG_HUMAN
sp|O94760|DDAH1_HUMAN
sp|O94766|B3GA3_HUMAN
sp|O94813|SLIT2_HUMAN;sp|O75094|SLIT3_HUMAN;sp|O75093|SLIT1_HUMAN
sp|O94903|PROSC_HUMAN
sp|O94910|LPHN1_HUMAN
sp|O94923|GLCE_HUMAN
sp|O94973|AP2A2_HUMAN
sp|O94979|SC31A_HUMAN
sp|O94985|CSTN1_HUMAN
sp|O95084|PRS23_HUMAN
sp|O95154|ARK73_HUMAN
sp|O95171|SCEL_HUMAN
sp|O95197|RTN3_HUMAN
sp|O95219|SNX4_HUMAN
sp|O95295|SNAPN_HUMAN
sp|O95336|6PGL_HUMAN
sp|O95340|PAPS2_HUMAN;sp|O43252|PAPS1_HUMAN
sp|O95359|TACC2_HUMAN
sp|O95373|IPO7_HUMAN
sp|O95394|AGM1_HUMAN
sp|O95490|AGRL2_HUMAN
sp|O95544|NADK_HUMAN
sp|O95671|ASML_HUMAN
sp|O95747|OXSR1_HUMAN;sp|Q9UEW8|STK39_HUMAN
sp|O95757|HS74L_HUMAN
sp|O95782|AP2A1_HUMAN
sp|O95793|STAU1_HUMAN
sp|O95816|BAG2_HUMAN
sp|O95831|AIFM1_HUMAN
sp|O95834|EMAL2_HUMAN
sp|O95841|ANGL1_HUMAN
sp|O95861|BPNT1_HUMAN
sp|O95865|DDAH2_HUMAN
sp|O95954|FTCD_HUMAN
sp|O95967|FBLN4_HUMAN
sp|O95980|RECK_HUMAN
sp|O96009|NAPSA_HUMAN
sp|P00326|ADH1G_HUMAN;sp|P00325|ADH1B_HUMAN;sp|P07327|ADH1A_HUMAN
sp|P00338|LDHA_HUMAN;sp|Q6ZMR3|LDH6A_HUMAN;sp|P07864|LDHC_HUMAN
sp|P00352|AL1A1_HUMAN
sp|P00367|DHE3_HUMAN;sp|P49448|DHE4_HUMAN
sp|P00387|NB5R3_HUMAN
sp|P00390|GSHR_HUMAN
sp|P00439|PH4H_HUMAN
sp|P00441|SODC_HUMAN
sp|P00450|CERU_HUMAN;CON__ENSEMBL:ENSBTAP00000031900
sp|P00491|PNPH_HUMAN
sp|P00492|HPRT_HUMAN
sp|P00505|AATM_HUMAN
sp|P00558|PGK1_HUMAN;sp|P07205|PGK2_HUMAN
sp|P00568|KAD1_HUMAN
sp|P00734|THRB_HUMAN;CON__P00735
sp|P00736|C1R_HUMAN
sp|P00738|HPT_HUMAN
sp|P00739|HPTR_HUMAN
sp|P00740|FA9_HUMAN
sp|P00742|FA10_HUMAN
sp|P00746|CFAD_HUMAN
sp|P00747|PLMN_HUMAN;CON__P06868;sp|Q15195|PLGA_HUMAN;sp|Q02325|PLGB_HUMAN
sp|P00748|FA12_HUMAN
sp|P00749|UROK_HUMAN
sp|P00750|TPA_HUMAN
sp|P00751|CFAB_HUMAN
sp|P00915|CAH1_HUMAN
sp|P00918|CAH2_HUMAN
sp|P00966|ASSY_HUMAN
sp|P01008|ANT3_HUMAN;CON__P41361
sp|P01009|A1AT_HUMAN
sp|P01011|AACT_HUMAN
sp|P01019|ANGT_HUMAN
sp|P01023|A2MG_HUMAN;CON__ENSEMBL:ENSBTAP00000024146;sp|P20742|PZP_HUMAN
sp|P01024|CO3_HUMAN
sp|P01031|CO5_HUMAN;CON__Q1A7A4
sp|P01034|CYTC_HUMAN
sp|P01037|CYTN_HUMAN;sp|P09228|CYTT_HUMAN;sp|P01036|CYTS_HUMAN
sp|P01040|CYTA_HUMAN
sp|P01042|KNG1_HUMAN;CON__P01045-1;CON__Q2KJ62;CON__P01044-1
sp|P01133|EGF_HUMAN
sp|P01137|TGFB1_HUMAN
sp|P01344|IGF2_HUMAN
sp|P01591|IGJ_HUMAN
sp|P01596|KV104_HUMAN;sp|P01598|KV106_HUMAN
sp|P01604|KV112_HUMAN
sp|P01610|KV118_HUMAN;sp|P80362|KV125_HUMAN;sp|P01609|KV117_HUMAN;sp|P01608|KV116_HUMAN;sp|P01607|KV115_HUMAN;sp|P01600|KV108_HUMAN;sp|P01599|KV107_HUMAN;sp|P01594|KV102_HUMAN;sp|P01593|KV101_HUMAN
sp|P01611|KV119_HUMAN
sp|P01613|KV121_HUMAN
sp|P01617|KV204_HUMAN;sp|P01614|KV201_HUMAN;sp|P06309|KV205_HUMAN;sp|P06310|KV206_HUMAN
sp|P01623|KV305_HUMAN;sp|P01620|KV302_HUMAN;sp|P04206|KV307_HUMAN;sp|P18136|KV313_HUMAN;sp|P18135|KV312_HUMAN
sp|P01621|KV303_HUMAN
sp|P01624|KV306_HUMAN
sp|P01625|KV402_HUMAN
sp|P01714|LV301_HUMAN
sp|P01717|LV403_HUMAN
sp|P01743|HV102_HUMAN
sp|P01765|HV304_HUMAN;sp|P01776|HV315_HUMAN;sp|P01764|HV303_HUMAN;sp|P01774|HV313_HUMAN
sp|P01766|HV305_HUMAN;sp|P01763|HV302_HUMAN;sp|P01777|HV316_HUMAN
sp|P01767|HV306_HUMAN
sp|P01771|HV310_HUMAN
sp|P01772|HV311_HUMAN
sp|P01780|HV319_HUMAN
sp|P01781|HV320_HUMAN;sp|P01782|HV321_HUMAN
sp|P01833|PIGR_HUMAN
sp|P01834|IGKC_HUMAN
sp|P01857|IGHG1_HUMAN
sp|P01859|IGHG2_HUMAN
sp|P01860|IGHG3_HUMAN
sp|P01861|IGHG4_HUMAN
sp|P01871|IGHM_HUMAN;sp|P04220|MUCB_HUMAN
sp|P01876|IGHA1_HUMAN
sp|P01877|IGHA2_HUMAN
sp|P02042|HBD_HUMAN;CON__Q3SX09;CON__P02070;sp|P69892|HBG2_HUMAN;sp|P69891|HBG1_HUMAN;sp|P02100|HBE_HUMAN
sp|P02462|CO4A1_HUMAN;sp|P29400|CO4A5_HUMAN
sp|P02511|CRYAB_HUMAN
sp|P02545|LMNA_HUMAN;sp|P20700|LMNB1_HUMAN
sp|P02647|APOA1_HUMAN;CON__P15497
sp|P02649|APOE_HUMAN;CON__Q03247
sp|P02654|APOC1_HUMAN
sp|P02656|APOC3_HUMAN
sp|P02671|FIBA_HUMAN
sp|P02675|FIBB_HUMAN;CON__P02676
sp|P02679|FIBG_HUMAN
sp|P02743|SAMP_HUMAN
sp|P02747|C1QC_HUMAN
sp|P02748|CO9_HUMAN;CON__Q3MHN2
sp|P02749|APOH_HUMAN;CON__P17690
sp|P02750|A2GL_HUMAN
sp|P02751|FINC_HUMAN
sp|P02753|RET4_HUMAN
sp|P02760|AMBP_HUMAN
sp|P02763|A1AG1_HUMAN
sp|P02765|FETUA_HUMAN
sp|P02766|TTHY_HUMAN
sp|P02774|VTDB_HUMAN;CON__Q3MHN5;CON__ENSEMBL:ENSBTAP00000018229
sp|P02786|TFR1_HUMAN
sp|P02787|TRFE_HUMAN;CON__Q2HJF0
sp|P02788|TRFL_HUMAN;CON__Q29443;CON__Q0IIK2
sp|P02790|HEMO_HUMAN
sp|P02810|PRPC_HUMAN
sp|P02814|SMR3B_HUMAN
sp|P03950|ANGI_HUMAN
sp|P03951|FA11_HUMAN
sp|P03952|KLKB1_HUMAN
sp|P03973|SLPI_HUMAN
sp|P04003|C4BPA_HUMAN
sp|P04004|VTNC_HUMAN;CON__Q3ZBS7
sp|P04040|CATA_HUMAN
sp|P04062|GLCM_HUMAN
sp|P04066|FUCO_HUMAN
sp|P04070|PROC_HUMAN
sp|P04075|ALDOA_HUMAN
sp|P04080|CYTB_HUMAN
sp|P04083|ANXA1_HUMAN
sp|P04085|PDGFA_HUMAN
sp|P04114|APOB_HUMAN;CON__ENSEMBL:ENSBTAP00000032840
sp|P04156|PRIO_HUMAN
sp|P04180|LCAT_HUMAN
sp|P04196|HRG_HUMAN
sp|P04208|LV106_HUMAN;sp|P01699|LV101_HUMAN;sp|P01700|LV102_HUMAN
sp|P04216|THY1_HUMAN
sp|P04217|A1BG_HUMAN;CON__Q2KJF1
sp|P04275|VWF_HUMAN
sp|P04406|G3P_HUMAN;sp|O14556|G3PT_HUMAN
sp|P04424|ARLY_HUMAN
sp|P04430|KV122_HUMAN
sp|P04632|CPNS1_HUMAN
sp|P04746|AMYP_HUMAN;sp|P19961|AMY2B_HUMAN;sp|P04745|AMY1_HUMAN;CON__Q3MHH8
sp|P04792|HSPB1_HUMAN
sp|P04899|GNAI2_HUMAN
sp|Q99878|H2A1J_HUMAN;sp|Q96KK5|H2A1H_HUMAN;sp|Q9BTM1|H2AJ_HUMAN;sp|Q16777|H2A2C_HUMAN;sp|Q93077|H2A1C_HUMAN;sp|Q7L7L0|H2A3_HUMAN;sp|Q6FI13|H2A2A_HUMAN;sp|P20671|H2A1D_HUMAN;sp|P0C0S8|H2A1_HUMAN;sp|P04908|H2A1B_HUMAN;sp|Q96QV6|H2A1A_HUMAN;sp|P16104|H2AX_HUMAN
sp|P05019|IGF1_HUMAN
sp|P05023|AT1A1_HUMAN;sp|P13637|AT1A3_HUMAN;sp|P50993|AT1A2_HUMAN;sp|Q13733|AT1A4_HUMAN;sp|P20648|ATP4A_HUMAN;sp|P54707|AT12A_HUMAN
sp|P05026|AT1B1_HUMAN
sp|P05060|SCG1_HUMAN
sp|P05062|ALDOB_HUMAN
sp|P05067|A4_HUMAN
sp|P05089|ARGI1_HUMAN
sp|P05090|APOD_HUMAN
sp|P05109|S10A8_HUMAN
sp|P05120|PAI2_HUMAN
sp|P05154|IPSP_HUMAN
sp|P05155|IC1_HUMAN;CON__P50448
sp|P05156|CFAI_HUMAN;CON__Q32PI4
sp|P05164|PERM_HUMAN;sp|P11678|PERE_HUMAN
sp|P05166|PCCB_HUMAN
sp|P05186|PPBT_HUMAN
sp|P05198|IF2A_HUMAN
sp|P05387|RLA2_HUMAN
sp|P05388|RLA0_HUMAN;sp|Q8NHW5|RLA0L_HUMAN
sp|P05452|TETN_HUMAN;CON__Q2KIS7
sp|P05455|LA_HUMAN
sp|P05534|1A24_HUMAN;sp|P30447|1A23_HUMAN;sp|P30455|1A36_HUMAN;sp|P30443|1A01_HUMAN;sp|P13746|1A11_HUMAN;sp|P04439|1A03_HUMAN;sp|P01893|HLAH_HUMAN;sp|Q09160|1A80_HUMAN
sp|P05543|THBG_HUMAN;CON__Q9TT36
sp|P05546|HEP2_HUMAN
sp|P05783|K1C18_HUMAN;CON__H-INV:HIT000015463;CON__Q92764;sp|Q92764|KRT35_HUMAN;CON__Q497I4
sp|P05937|CALB1_HUMAN;sp|P22676|CALB2_HUMAN
sp|P05981|HEPS_HUMAN
sp|P06280|AGAL_HUMAN
sp|P06311|KV311_HUMAN
sp|P83593|KV405_HUMAN;sp|P06312|KV401_HUMAN;sp|P06313|KV403_HUMAN;sp|P06314|KV404_HUMAN
sp|P06331|HV209_HUMAN;sp|P01825|HV207_HUMAN
sp|P06576|ATPB_HUMAN
sp|P06681|CO2_HUMAN
sp|P06702|S10A9_HUMAN
sp|P06703|S10A6_HUMAN
sp|P06727|APOA4_HUMAN
sp|P06730|IF4E_HUMAN
sp|P06733|ENOA_HUMAN;sp|P09104|ENOG_HUMAN
sp|P06737|PYGL_HUMAN
sp|P06744|G6PI_HUMAN;CON__Q3ZBD7
sp|P06748|NPM_HUMAN
sp|P06753|TPM3_HUMAN;sp|P09493|TPM1_HUMAN
sp|P06756|ITAV_HUMAN
sp|P06858|LIPL_HUMAN
sp|P06865|HEXA_HUMAN
sp|P06870|KLK1_HUMAN
sp|Q8N257|H2B3B_HUMAN;sp|Q16778|H2B2E_HUMAN;sp|P33778|H2B1B_HUMAN;sp|P23527|H2B1O_HUMAN;sp|P06899|H2B1J_HUMAN;sp|Q6DRA6|H2B2D_HUMAN;sp|Q6DN03|H2B2C_HUMAN
sp|P07093|GDN_HUMAN
sp|P07099|HYEP_HUMAN
sp|P07195|LDHB_HUMAN
sp|P07203|GPX1_HUMAN
sp|P07225|PROS_HUMAN
sp|P07237|PDIA1_HUMAN
sp|P07305|H10_HUMAN
sp|P07339|CATD_HUMAN
sp|P07355|ANXA2_HUMAN;sp|A6NMY6|AXA2L_HUMAN
sp|P07357|CO8A_HUMAN
sp|P07358|CO8B_HUMAN
sp|P07360|CO8G_HUMAN
sp|P07384|CAN1_HUMAN
sp|P07437|TBB5_HUMAN;sp|A6NNZ2|TBB8L_HUMAN;sp|Q9BUF5|TBB6_HUMAN;sp|Q9H4B7|TBB1_HUMAN;CON__ENSEMBL:ENSBTAP00000025008
sp|P07476|INVO_HUMAN
sp|P07602|SAP_HUMAN
sp|P07686|HEXB_HUMAN
sp|P07711|CATL1_HUMAN
sp|P07741|APT_HUMAN
sp|P07814|SYEP_HUMAN
sp|P07858|CATB_HUMAN
sp|P07900|HS90A_HUMAN;sp|Q14568|HS902_HUMAN;sp|Q58FG0|HS905_HUMAN
sp|P07902|GALT_HUMAN
sp|P07910|HNRPC_HUMAN;sp|P0DMR1|HNRC4_HUMAN;sp|O60812|HNRC1_HUMAN;sp|B7ZW38|HNRC3_HUMAN;sp|B2RXH8|HNRC2_HUMAN
sp|P07911|UROM_HUMAN
sp|P07942|LAMB1_HUMAN
sp|P07954|FUMH_HUMAN
sp|P07998|RNAS1_HUMAN
sp|P08123|CO1A2_HUMAN
sp|P08133|ANXA6_HUMAN
sp|P08134|RHOC_HUMAN;sp|P62745|RHOB_HUMAN
sp|P08183|MDR1_HUMAN
sp|P08185|CBG_HUMAN
sp|P08195|4F2_HUMAN
sp|P08236|BGLR_HUMAN
sp|P08237|PFKAM_HUMAN
sp|P08238|HS90B_HUMAN;sp|Q58FF7|H90B3_HUMAN;sp|Q58FF8|H90B2_HUMAN
sp|P08246|ELNE_HUMAN
sp|P08253|MMP2_HUMAN
sp|P08263|GSTA1_HUMAN;sp|Q16772|GSTA3_HUMAN;sp|Q7RTV2|GSTA5_HUMAN
sp|P08294|SODE_HUMAN
sp|P08311|CATG_HUMAN
sp|P08473|NEP_HUMAN
sp|P08571|CD14_HUMAN
sp|P08572|CO4A2_HUMAN
sp|P08581|MET_HUMAN
sp|P08582|TRFM_HUMAN
sp|P08603|CFAH_HUMAN;sp|Q02985|FHR3_HUMAN
sp|P08637|FCG3A_HUMAN;sp|O75015|FCG3B_HUMAN
sp|P08670|VIME_HUMAN
sp|P08697|A2AP_HUMAN;CON__P28800
sp|P0CW22|RS17L_HUMAN;sp|P08708|RS17_HUMAN
sp|P08758|ANXA5_HUMAN
sp|P08865|RSSA_HUMAN
sp|P08962|CD63_HUMAN
sp|P08F94|PKHD1_HUMAN
sp|P09210|GSTA2_HUMAN
sp|P09211|GSTP1_HUMAN
sp|P09237|MMP7_HUMAN
sp|P09327|VILI_HUMAN
sp|P09417|DHPR_HUMAN
sp|P09429|HMGB1_HUMAN;sp|B2RPK0|HGB1A_HUMAN
sp|P09467|F16P1_HUMAN
sp|P09486|SPRC_HUMAN
sp|P09488|GSTM1_HUMAN;sp|Q03013|GSTM4_HUMAN
sp|P09525|ANXA4_HUMAN
sp|P09543|CN37_HUMAN
sp|P09564|CD7_HUMAN
sp|P09622|DLDH_HUMAN
sp|Q32P51|RA1L2_HUMAN;sp|P09651|ROA1_HUMAN
sp|P09668|CATH_HUMAN
sp|P09758|TACD2_HUMAN
sp|P09871|C1S_HUMAN
sp|P09936|UCHL1_HUMAN
sp|P09958|FURIN_HUMAN
sp|P09960|LKHA4_HUMAN
sp|P09972|ALDOC_HUMAN
sp|P0C0L4|CO4A_HUMAN;CON__ENSEMBL:ENSBTAP00000007350;CON__P01030
sp|P0C0L5|CO4B_HUMAN
sp|P0C7U0|ELFN1_HUMAN
sp|P0CG06|LAC3_HUMAN;sp|P0CG05|LAC2_HUMAN;sp|P0CF74|LAC6_HUMAN;sp|A0M8Q6|LAC7_HUMAN
sp|P62987|RL40_HUMAN;sp|P62979|RS27A_HUMAN;sp|P0CG47|UBB_HUMAN;sp|P0CG48|UBC_HUMAN
sp|P0DMV9|HS71B_HUMAN;sp|P0DMV8|HS71A_HUMAN
sp|P10153|RNAS2_HUMAN
sp|P10155|RO60_HUMAN
sp|P10253|LYAG_HUMAN
sp|P30512|1A29_HUMAN;sp|P30459|1A74_HUMAN;sp|P30453|1A34_HUMAN;sp|P16190|1A33_HUMAN;sp|P16189|1A31_HUMAN;sp|P10314|1A32_HUMAN;sp|P30457|1A66_HUMAN;sp|P30456|1A43_HUMAN;sp|P30450|1A26_HUMAN;sp|P18462|1A25_HUMAN
sp|P10321|1C07_HUMAN
sp|P10412|H14_HUMAN
sp|P10451|OSTP_HUMAN;CON__P31096
sp|P10599|THIO_HUMAN
sp|P10619|PPGB_HUMAN
sp|P10643|CO7_HUMAN;CON__Q29RQ1
sp|P10644|KAP0_HUMAN
sp|P10646|TFPI1_HUMAN
sp|P10768|ESTD_HUMAN
sp|P10809|CH60_HUMAN
sp|P10909|CLUS_HUMAN
sp|P11021|GRP78_HUMAN
sp|P11047|LAMC1_HUMAN
sp|P11117|PPAL_HUMAN
sp|P11142|HSP7C_HUMAN
sp|P11172|UMPS_HUMAN
sp|P11216|PYGB_HUMAN;sp|P11217|PYGM_HUMAN
sp|P11234|RALB_HUMAN;sp|P11233|RALA_HUMAN
sp|P11277|SPTB1_HUMAN
sp|P11310|ACADM_HUMAN
sp|P11413|G6PD_HUMAN
sp|P11586|C1TC_HUMAN
sp|P11597|CETP_HUMAN
sp|P11717|MPRI_HUMAN
sp|P11766|ADHX_HUMAN
sp|P11908|PRPS2_HUMAN
sp|P11940|PABP1_HUMAN;sp|Q9H361|PABP3_HUMAN;sp|Q4VXU2|PAP1L_HUMAN
sp|P12081|SYHC_HUMAN;sp|P49590|SYHM_HUMAN
sp|P12109|CO6A1_HUMAN
sp|P12111|CO6A3_HUMAN
sp|P12268|IMDH2_HUMAN;sp|P20839|IMDH1_HUMAN
sp|P12273|PIP_HUMAN
sp|P12277|KCRB_HUMAN;sp|P06732|KCRM_HUMAN
sp|P12429|ANXA3_HUMAN
sp|P12532|KCRU_HUMAN
sp|P12724|ECP_HUMAN
sp|P12830|CADH1_HUMAN
sp|P12931|SRC_HUMAN;sp|P07947|YES_HUMAN;sp|P06239|LCK_HUMAN;sp|P06241|FYN_HUMAN
sp|P12955|PEPD_HUMAN
sp|P12956|XRCC6_HUMAN
sp|P13010|XRCC5_HUMAN
sp|P13164|IFM1_HUMAN;sp|Q01629|IFM2_HUMAN;sp|Q01628|IFM3_HUMAN
sp|P13489|RINI_HUMAN
sp|P13598|ICAM2_HUMAN
sp|P13611|CSPG2_HUMAN
sp|P13639|EF2_HUMAN;sp|Q15029|U5S1_HUMAN
sp|P13667|PDIA4_HUMAN
sp|P13671|CO6_HUMAN
sp|P13686|PPA5_HUMAN
sp|P13716|HEM2_HUMAN
sp|P13796|PLSL_HUMAN
sp|P13797|PLST_HUMAN
sp|Q5VT79|AXA82_HUMAN;sp|Q5T2P8|AXA81_HUMAN;sp|P13928|ANXA8_HUMAN
sp|P13987|CD59_HUMAN
sp|P14384|CBPM_HUMAN
sp|P14406|CX7A2_HUMAN
sp|P14543|NID1_HUMAN
sp|P14550|AK1A1_HUMAN
sp|P14618|KPYM_HUMAN
sp|P14625|ENPL_HUMAN;sp|Q58FF3|ENPLL_HUMAN
sp|P63162|RSMN_HUMAN;sp|P14678|RSMB_HUMAN
sp|P14735|IDE_HUMAN
sp|P14780|MMP9_HUMAN
sp|P14868|SYDC_HUMAN
sp|P14923|PLAK_HUMAN
sp|P15104|GLNA_HUMAN
sp|P15121|ALDR_HUMAN
sp|P15144|AMPN_HUMAN
sp|P15151|PVR_HUMAN
sp|P15153|RAC2_HUMAN;sp|P60763|RAC3_HUMAN
sp|P15170|ERF3A_HUMAN;sp|Q8IYD1|ERF3B_HUMAN
sp|P15289|ARSA_HUMAN
sp|P15291|B4GT1_HUMAN
sp|P15309|PPAP_HUMAN
sp|P15311|EZRI_HUMAN
sp|P15313|VATB1_HUMAN
sp|P15328|FOLR1_HUMAN
sp|P15374|UCHL3_HUMAN
sp|P15428|PGDH_HUMAN
sp|P15531|NDKA_HUMAN
sp|P15559|NQO1_HUMAN
sp|P15586|GNS_HUMAN
sp|P15814|IGLL1_HUMAN
sp|P15822|ZEP1_HUMAN
sp|P15848|ARSB_HUMAN
sp|P15880|RS2_HUMAN
sp|P15907|SIAT1_HUMAN
sp|P15924|DESP_HUMAN
sp|P15941|MUC1_HUMAN
sp|P16035|TIMP2_HUMAN
sp|P16066|ANPRA_HUMAN
sp|P16070|CD44_HUMAN
sp|P16083|NQO2_HUMAN
sp|P16152|CBR1_HUMAN
sp|P16278|BGAL_HUMAN
sp|P16389|KCNA2_HUMAN
sp|P16401|H15_HUMAN
sp|P16403|H12_HUMAN;sp|P16402|H13_HUMAN;sp|P22492|H1T_HUMAN;sp|Q02539|H11_HUMAN
sp|P16422|EPCAM_HUMAN
sp|P16444|DPEP1_HUMAN
sp|P16870|CBPE_HUMAN
sp|P16885|PLCG2_HUMAN
sp|P17050|NAGAB_HUMAN
sp|P17066|HSP76_HUMAN;sp|P48741|HSP77_HUMAN
sp|P17174|AATC_HUMAN
sp|P17181|INAR1_HUMAN
sp|P17213|BPI_HUMAN
sp|P17342|ANPRC_HUMAN
sp|P17405|ASM_HUMAN
sp|P17540|KCRS_HUMAN
sp|P17655|CAN2_HUMAN
sp|P17813|EGLN_HUMAN
sp|P17858|PFKAL_HUMAN
sp|P17900|SAP3_HUMAN
sp|P17927|CR1_HUMAN;sp|Q2VPA4|CR1L_HUMAN
sp|P17931|LEG3_HUMAN
sp|P17936|IBP3_HUMAN
sp|P17980|PRS6A_HUMAN
sp|P17987|TCPA_HUMAN
sp|P18054|LOX12_HUMAN
sp|P18065|IBP2_HUMAN
sp|P18085|ARF4_HUMAN
sp|P18124|RL7_HUMAN
sp|P18206|VINC_HUMAN
sp|P18428|LBP_HUMAN
sp|P18669|PGAM1_HUMAN;sp|P15259|PGAM2_HUMAN;sp|Q8N0Y7|PGAM4_HUMAN
sp|P18827|SDC1_HUMAN
sp|P18850|ATF6A_HUMAN
sp|P19021|AMD_HUMAN
sp|P19338|NUCL_HUMAN
sp|P19367|HXK1_HUMAN;sp|Q2TB90|HKDC1_HUMAN;sp|P52789|HXK2_HUMAN
sp|P19440|GGT1_HUMAN;sp|A6NGU5|GGT3_HUMAN;sp|P36268|GGT2_HUMAN;sp|Q14390|GGTL2_HUMAN;sp|B5MD39|GGTL3_HUMAN;sp|Q9BX51|GGTL1_HUMAN
sp|P19801|AOC1_HUMAN
sp|P19823|ITIH2_HUMAN;CON__Q9TRI1
sp|P19827|ITIH1_HUMAN;CON__Q0VCM5
sp|P19835|CEL_HUMAN
sp|P19957|ELAF_HUMAN
sp|P20042|IF2B_HUMAN
sp|P20062|TCO2_HUMAN
sp|P20073|ANXA7_HUMAN
sp|P20138|CD33_HUMAN
sp|P20160|CAP7_HUMAN
sp|P20290|BTF3_HUMAN
sp|P20336|RAB3A_HUMAN
sp|Q9NRW1|RAB6B_HUMAN;sp|P20340|RAB6A_HUMAN;sp|Q14964|RB39A_HUMAN
sp|P20618|PSB1_HUMAN
sp|P20711|DDC_HUMAN
sp|P20810|ICAL_HUMAN
sp|P20827|EFNA1_HUMAN
sp|P60891|PRPS1_HUMAN;sp|P21108|PRPS3_HUMAN
sp|P51993|FUT6_HUMAN;sp|P21217|FUT3_HUMAN;sp|Q11128|FUT5_HUMAN
sp|P21266|GSTM3_HUMAN
sp|P21281|VATB2_HUMAN
sp|P21283|VATC1_HUMAN
sp|P21291|CSRP1_HUMAN
sp|P21333|FLNA_HUMAN
sp|P21399|ACOC_HUMAN;sp|O00408|PDE2A_HUMAN
sp|P21695|GPDA_HUMAN
sp|P21709|EPHA1_HUMAN
sp|P21741|MK_HUMAN
sp|P21796|VDAC1_HUMAN
sp|P21810|PGS1_HUMAN
sp|P21926|CD9_HUMAN
sp|P21964|COMT_HUMAN
sp|P21980|TGM2_HUMAN
sp|P22004|BMP6_HUMAN
sp|P22059|OSBP1_HUMAN
sp|P22061|PIMT_HUMAN
sp|P22102|PUR2_HUMAN
sp|P22105|TENX_HUMAN;sp|Q16473|TENXA_HUMAN
sp|P22234|PUR6_HUMAN
sp|P22314|UBA1_HUMAN
sp|P22352|GPX3_HUMAN
sp|P22392|NDKB_HUMAN
sp|P22528|SPR1B_HUMAN
sp|P22626|ROA2_HUMAN
sp|P22692|IBP4_HUMAN
sp|P22695|QCR2_HUMAN
sp|P22732|GTR5_HUMAN
sp|P22735|TGM1_HUMAN
sp|P22792|CPN2_HUMAN
sp|P22891|PROZ_HUMAN
sp|P23083|HV103_HUMAN
sp|P23142|FBLN1_HUMAN;CON__ENSEMBL:ENSBTAP00000016046
sp|P23246|SFPQ_HUMAN
sp|P23284|PPIB_HUMAN
sp|P23381|SYWC_HUMAN
sp|P23396|RS3_HUMAN
sp|P23470|PTPRG_HUMAN
sp|P23490|LORI_HUMAN
sp|P23526|SAHH_HUMAN
sp|P23528|COF1_HUMAN
sp|P24158|PRTN3_HUMAN
sp|P24298|ALAT1_HUMAN;sp|Q8TD30|ALAT2_HUMAN
sp|P24534|EF1B_HUMAN
sp|P24539|AT5F1_HUMAN
sp|P24593|IBP5_HUMAN
sp|P24752|THIL_HUMAN
sp|P24821|TENA_HUMAN
sp|P24855|DNAS1_HUMAN
sp|P25311|ZA2G_HUMAN
sp|P25325|THTM_HUMAN
sp|P25391|LAMA1_HUMAN;sp|P24043|LAMA2_HUMAN
sp|P25685|DNJB1_HUMAN;sp|Q9UDY4|DNJB4_HUMAN
sp|P25705|ATPA_HUMAN
sp|P25774|CATS_HUMAN
sp|P25786|PSA1_HUMAN
sp|P25787|PSA2_HUMAN
sp|P25788|PSA3_HUMAN
sp|P25789|PSA4_HUMAN
sp|P25815|S100P_HUMAN
sp|P26006|ITA3_HUMAN
sp|P26038|MOES_HUMAN
sp|P26196|DDX6_HUMAN
sp|P26373|RL13_HUMAN
sp|P26440|IVD_HUMAN
sp|P26572|MGAT1_HUMAN
sp|P26583|HMGB2_HUMAN
sp|P26639|SYTC_HUMAN;sp|A2RTX5|SYTC2_HUMAN
sp|P26640|SYVC_HUMAN
sp|P26641|EF1G_HUMAN
sp|P26992|CNTFR_HUMAN
sp|P27105|STOM_HUMAN
sp|P27169|PON1_HUMAN
sp|P27348|1433T_HUMAN
sp|P27361|MK03_HUMAN;sp|P31152|MK04_HUMAN;sp|Q16659|MK06_HUMAN
sp|P27482|CALL3_HUMAN
sp|P27487|DPP4_HUMAN
sp|P27695|APEX1_HUMAN
sp|P27708|PYR1_HUMAN
sp|P27797|CALR_HUMAN
sp|P27824|CALX_HUMAN
sp|P27918|PROP_HUMAN
sp|P28062|PSB8_HUMAN
sp|P28066|PSA5_HUMAN
sp|P28070|PSB4_HUMAN
sp|P28072|PSB6_HUMAN
sp|P28074|PSB5_HUMAN
sp|P28161|GSTM2_HUMAN
sp|P28332|ADH6_HUMAN
sp|P28482|MK01_HUMAN
sp|P28838|AMPL_HUMAN
sp|P29144|TPP2_HUMAN
sp|P29279|CTGF_HUMAN
sp|P29401|TKT_HUMAN
sp|P29508|SPB3_HUMAN
sp|P29622|KAIN_HUMAN
sp|P29692|EF1D_HUMAN
sp|P29966|MARCS_HUMAN
sp|P29972|AQP1_HUMAN
sp|P30038|AL4A1_HUMAN
sp|P30039|PBLD_HUMAN
sp|P30041|PRDX6_HUMAN
sp|P30043|BLVRB_HUMAN
sp|P30044|PRDX5_HUMAN
sp|P30047|GFRP_HUMAN
sp|P30050|RL12_HUMAN
sp|P30084|ECHM_HUMAN
sp|P30085|KCY_HUMAN
sp|P30086|PEBP1_HUMAN
sp|P30101|PDIA3_HUMAN
sp|P30153|2AAA_HUMAN
sp|P30419|NMT1_HUMAN
sp|Q29940|1B59_HUMAN;sp|P30493|1B55_HUMAN;sp|P30492|1B54_HUMAN
sp|P30504|1C04_HUMAN;sp|Q29865|1C18_HUMAN;sp|P30510|1C14_HUMAN;sp|P30499|1C01_HUMAN
sp|P30520|PURA2_HUMAN
sp|P30530|UFO_HUMAN
sp|P30556|AGTR1_HUMAN
sp|P30566|PUR8_HUMAN
sp|P30613|KPYR_HUMAN
sp|P30622|CLIP1_HUMAN
sp|P30711|GSTT1_HUMAN
sp|P30740|ILEU_HUMAN
sp|P31025|LCN1_HUMAN;sp|Q5VSP4|LC1L1_HUMAN
sp|P31040|SDHA_HUMAN
sp|P31146|COR1A_HUMAN
sp|P31150|GDIA_HUMAN
sp|P31151|S10A7_HUMAN;sp|Q86SG5|S1A7A_HUMAN
sp|P31153|METK2_HUMAN;sp|Q00266|METK1_HUMAN
sp|P31371|FGF9_HUMAN;sp|O43320|FGF16_HUMAN;sp|Q9NP95|FGF20_HUMAN
sp|P31431|SDC4_HUMAN
sp|P31689|DNJA1_HUMAN
sp|P31930|QCR1_HUMAN
sp|P31939|PUR9_HUMAN
sp|P55795|HNRH2_HUMAN;sp|P31943|HNRH1_HUMAN
sp|P31944|CASPE_HUMAN
sp|P31946|1433B_HUMAN
sp|P31947|1433S_HUMAN
sp|P31948|STIP1_HUMAN
sp|P31949|S10AB_HUMAN
sp|P32004|L1CAM_HUMAN
sp|P32119|PRDX2_HUMAN
sp|P32189|GLPK_HUMAN;sp|Q14409|GLPK3_HUMAN
sp|P32320|CDD_HUMAN
sp|P32456|GBP2_HUMAN
sp|P32754|HPPD_HUMAN
sp|P32926|DSG3_HUMAN
sp|P32929|CGL_HUMAN
sp|P33176|KINH_HUMAN;sp|O60282|KIF5C_HUMAN;sp|Q12840|KIF5A_HUMAN
sp|P33908|MA1A1_HUMAN
sp|P34059|GALNS_HUMAN
sp|P34896|GLYC_HUMAN;sp|P34897|GLYM_HUMAN
sp|P34913|HYES_HUMAN
sp|P34932|HSP74_HUMAN
sp|P34949|MPI_HUMAN
sp|P35030|TRY3_HUMAN
sp|P35052|GPC1_HUMAN
sp|P35080|PROF2_HUMAN
sp|P35221|CTNA1_HUMAN;sp|P26232|CTNA2_HUMAN;sp|Q9UI47|CTNA3_HUMAN
sp|P35232|PHB_HUMAN
sp|P35237|SPB6_HUMAN;sp|P50452|SPB8_HUMAN
sp|P35241|RADI_HUMAN
sp|P35268|RL22_HUMAN
sp|P35270|SPRE_HUMAN;REV__sp|Q16649|NFIL3_HUMAN
sp|P35321|SPR1A_HUMAN
sp|P35326|SPR2A_HUMAN;sp|P35325|SPR2B_HUMAN;sp|P22532|SPR2D_HUMAN;sp|P22531|SPR2E_HUMAN;sp|Q9BYE4|SPR2G_HUMAN;sp|Q96RM1|SPR2F_HUMAN
sp|P35542|SAA4_HUMAN
sp|P35555|FBN1_HUMAN
sp|P35556|FBN2_HUMAN
sp|P35558|PCKGC_HUMAN
sp|P35573|GDE_HUMAN
sp|P35579|MYH9_HUMAN;sp|P12883|MYH7_HUMAN;sp|P13535|MYH8_HUMAN;sp|Q9UKX3|MYH13_HUMAN;sp|Q9Y623|MYH4_HUMAN;sp|P13533|MYH6_HUMAN;sp|P12882|MYH1_HUMAN;sp|P11055|MYH3_HUMAN;sp|Q9UKX2|MYH2_HUMAN;sp|A7E2Y1|MYH7B_HUMAN
sp|P35580|MYH10_HUMAN
sp|P35606|COPB2_HUMAN
sp|P35611|ADDA_HUMAN
sp|P35813|PPM1A_HUMAN
sp|P35858|ALS_HUMAN
sp|P35998|PRS7_HUMAN
sp|P36405|ARL3_HUMAN
sp|P36542|ATPG_HUMAN
sp|P36543|VATE1_HUMAN;sp|Q96A05|VATE2_HUMAN
sp|P36578|RL4_HUMAN
sp|P36871|PGM1_HUMAN
sp|P36952|SPB5_HUMAN
sp|P36955|PEDF_HUMAN;CON__Q95121
sp|P36957|ODO2_HUMAN
sp|P36969|GPX4_HUMAN
sp|P37108|SRP14_HUMAN
sp|P37802|TAGL2_HUMAN
sp|P37837|TALDO_HUMAN
sp|P38571|LICH_HUMAN
sp|P38606|VATA_HUMAN
sp|P38646|GRP75_HUMAN
sp|P39019|RS19_HUMAN
sp|P39059|COFA1_HUMAN
sp|P39060|COIA1_HUMAN
sp|P39656|OST48_HUMAN
sp|P40121|CAPG_HUMAN
sp|P40197|GPV_HUMAN
sp|P40227|TCPZ_HUMAN;sp|Q92526|TCPW_HUMAN
sp|P40429|RL13A_HUMAN
sp|P40763|STAT3_HUMAN
sp|P40925|MDHC_HUMAN
sp|P40926|MDHM_HUMAN
sp|P40939|ECHA_HUMAN
sp|P41091|IF2G_HUMAN;sp|Q2VIR3|IF2GL_HUMAN
sp|P41218|MNDA_HUMAN
sp|P41222|PTGDS_HUMAN
sp|P41250|SYG_HUMAN
sp|P41252|SYIC_HUMAN
sp|P41743|KPCI_HUMAN
sp|P42224|STAT1_HUMAN
sp|P42330|AK1C3_HUMAN;sp|P17516|AK1C4_HUMAN
sp|P42338|PK3CB_HUMAN
sp|P42702|LIFR_HUMAN
sp|P42765|THIM_HUMAN
sp|P42785|PCP_HUMAN
sp|P43034|LIS1_HUMAN
sp|P43251|BTD_HUMAN
sp|P43487|RANG_HUMAN;sp|Q9C010|IPKB_HUMAN
sp|P43490|NAMPT_HUMAN
sp|P43686|PRS6B_HUMAN
sp|P45381|ACY2_HUMAN
sp|P45877|PPIC_HUMAN
sp|P45880|VDAC2_HUMAN
sp|P45974|UBP5_HUMAN
sp|P46459|NSF_HUMAN
sp|P46777|RL5_HUMAN
sp|P46779|RL28_HUMAN
sp|P46781|RS9_HUMAN
sp|P46782|RS5_HUMAN
sp|P46926|GNPI1_HUMAN;sp|Q8TDQ7|GNPI2_HUMAN
sp|P46940|IQGA1_HUMAN
sp|P47755|CAZA2_HUMAN
sp|P47756|CAPZB_HUMAN
sp|P47897|SYQ_HUMAN
sp|P47914|RL29_HUMAN
sp|P48047|ATPO_HUMAN
sp|P48061|SDF1_HUMAN
sp|P48147|PPCE_HUMAN
sp|P48307|TFPI2_HUMAN
sp|P48426|PI42A_HUMAN
sp|P48444|COPD_HUMAN
sp|P48506|GSH1_HUMAN
sp|P48556|PSMD8_HUMAN
sp|P48594|SPB4_HUMAN
sp|P48595|SPB10_HUMAN
sp|P48643|TCPE_HUMAN
sp|P48735|IDHP_HUMAN
sp|P48745|NOV_HUMAN
sp|P49184|DNSL1_HUMAN
sp|P49189|AL9A1_HUMAN
sp|P49257|LMAN1_HUMAN
sp|P49327|FAS_HUMAN
sp|P49354|FNTA_HUMAN
sp|P49368|TCPG_HUMAN
sp|P49407|ARRB1_HUMAN
sp|P49419|AL7A1_HUMAN
sp|P49441|INPP_HUMAN
sp|P49458|SRP09_HUMAN
sp|P49588|SYAC_HUMAN
sp|P49589|SYCC_HUMAN
sp|P49591|SYSC_HUMAN
sp|P49641|MA2A2_HUMAN
sp|P49720|PSB3_HUMAN
sp|P49721|PSB2_HUMAN
sp|P49747|COMP_HUMAN;CON__ENSEMBL:ENSBTAP00000006074;sp|P35443|TSP4_HUMAN
sp|P49748|ACADV_HUMAN
sp|P49773|HINT1_HUMAN
sp|P49788|TIG1_HUMAN
sp|P49862|KLK7_HUMAN
sp|P49902|5NTC_HUMAN
sp|P49908|SEPP1_HUMAN
sp|P49913|CAMP_HUMAN
sp|P50053|KHK_HUMAN
sp|P50225|ST1A1_HUMAN;sp|P50226|ST1A2_HUMAN;sp|P0DMN0|ST1A4_HUMAN;sp|P0DMM9|ST1A3_HUMAN
sp|P50395|GDIB_HUMAN
sp|P50440|GATM_HUMAN
sp|P50502|F10A1_HUMAN;sp|Q8NFI4|F10A5_HUMAN;sp|Q8IZP2|ST134_HUMAN
sp|P50552|VASP_HUMAN
sp|P50570|DYN2_HUMAN;sp|Q9UQ16|DYN3_HUMAN;sp|Q05193|DYN1_HUMAN
sp|P50579|MAP2_HUMAN
sp|P50591|TNF10_HUMAN
sp|P50851|LRBA_HUMAN
sp|P50895|BCAM_HUMAN
sp|P50897|PPT1_HUMAN
sp|P50914|RL14_HUMAN
sp|P50990|TCPQ_HUMAN
sp|P50991|TCPD_HUMAN
sp|P50995|ANX11_HUMAN
sp|P51148|RAB5C_HUMAN
sp|P51149|RAB7A_HUMAN
sp|P51170|SCNNG_HUMAN
sp|P51178|PLCD1_HUMAN
sp|P51570|GALK1_HUMAN
sp|P51580|TPMT_HUMAN
sp|P51606|RENBP_HUMAN
sp|P51649|SSDH_HUMAN
sp|P51654|GPC3_HUMAN;REV__sp|Q96HE7|ERO1A_HUMAN
sp|P51659|DHB4_HUMAN
sp|P51665|PSMD7_HUMAN
sp|P51688|SPHM_HUMAN
sp|P51812|KS6A3_HUMAN
sp|P51857|AK1D1_HUMAN
sp|P51884|LUM_HUMAN;CON__Q05443
sp|P52209|6PGD_HUMAN
sp|P52272|HNRPM_HUMAN
sp|P52306|GDS1_HUMAN
sp|P52565|GDIR1_HUMAN
sp|P52758|UK114_HUMAN
sp|P52790|HXK3_HUMAN
sp|P52823|STC1_HUMAN
sp|P52848|NDST1_HUMAN
sp|P52888|THOP1_HUMAN
sp|P52907|CAZA1_HUMAN
sp|P52943|CRIP2_HUMAN
sp|P53004|BIEA_HUMAN
sp|P53367|ARFP1_HUMAN
sp|P53396|ACLY_HUMAN
sp|P53618|COPB_HUMAN
sp|P53621|COPA_HUMAN
sp|P53634|CATC_HUMAN
sp|P53801|PTTG_HUMAN
sp|P53990|IST1_HUMAN
sp|P53999|TCP4_HUMAN
sp|P54108|CRIS3_HUMAN
sp|P54136|SYRC_HUMAN
sp|P54289|CA2D1_HUMAN
sp|P54577|SYYC_HUMAN
sp|P54578|UBP14_HUMAN
sp|P54619|AAKG1_HUMAN
sp|P54646|AAPK2_HUMAN
sp|P54652|HSP72_HUMAN
sp|P54710|ATNG_HUMAN
sp|P54753|EPHB3_HUMAN;sp|P54762|EPHB1_HUMAN
sp|P54760|EPHB4_HUMAN
sp|P54793|ARSF_HUMAN;sp|Q5FYA8|ARSH_HUMAN;sp|P51690|ARSE_HUMAN;sp|P51689|ARSD_HUMAN
sp|P54802|ANAG_HUMAN
sp|P54803|GALC_HUMAN
sp|P54920|SNAA_HUMAN;sp|Q9H115|SNAB_HUMAN
sp|P55010|IF5_HUMAN
sp|P55017|S12A3_HUMAN
sp|P55036|PSMD4_HUMAN;sp|A2A3N6|PIPSL_HUMAN
sp|P55060|XPO2_HUMAN
sp|P55072|TERA_HUMAN
sp|P55084|ECHB_HUMAN
sp|P55145|MANF_HUMAN
sp|P55209|NP1L1_HUMAN
sp|P55263|ADK_HUMAN
sp|P55268|LAMB2_HUMAN
sp|P55285|CADH6_HUMAN
sp|P55287|CAD11_HUMAN
sp|P55290|CAD13_HUMAN
sp|P55291|CAD15_HUMAN
sp|P55735|SEC13_HUMAN
sp|P55786|PSA_HUMAN;sp|A6NEC2|PSAL_HUMAN
sp|Q6EEV6|SUMO4_HUMAN;sp|P61956|SUMO2_HUMAN;sp|P55854|SUMO3_HUMAN
sp|P55884|EIF3B_HUMAN
sp|P56192|SYMC_HUMAN
sp|P56537|IF6_HUMAN
sp|P58499|FAM3B_HUMAN
sp|P59666|DEF3_HUMAN;sp|P59665|DEF1_HUMAN
sp|P59998|ARPC4_HUMAN
sp|P60022|DEFB1_HUMAN
sp|P60033|CD81_HUMAN
sp|P60174|TPIS_HUMAN
sp|P60228|EIF3E_HUMAN
sp|P60660|MYL6_HUMAN;sp|P14649|MYL6B_HUMAN
sp|P60709|ACTB_HUMAN;sp|Q6S8J3|POTEE_HUMAN;sp|A5A3E0|POTEF_HUMAN;sp|P0CG38|POTEI_HUMAN;sp|Q9BYX7|ACTBM_HUMAN;sp|P0CG39|POTEJ_HUMAN
sp|P60842|IF4A1_HUMAN;sp|P38919|IF4A3_HUMAN
sp|P60866|RS20_HUMAN
sp|P60900|PSA6_HUMAN
sp|P60953|CDC42_HUMAN;sp|P84095|RHOG_HUMAN;sp|P17081|RHOQ_HUMAN;sp|Q9H4E5|RHOJ_HUMAN
sp|P60981|DEST_HUMAN
sp|P60983|GMFB_HUMAN;sp|O60234|GMFG_HUMAN
sp|P61006|RAB8A_HUMAN;sp|P51153|RAB13_HUMAN;sp|P59190|RAB15_HUMAN;sp|P20337|RAB3B_HUMAN;sp|O95716|RAB3D_HUMAN;sp|Q96E17|RAB3C_HUMAN
sp|P61026|RAB10_HUMAN
sp|P61088|UBE2N_HUMAN;sp|Q5JXB2|UE2NL_HUMAN
sp|P61106|RAB14_HUMAN
sp|P61158|ARP3_HUMAN;sp|Q9P1U1|ARP3B_HUMAN;sp|Q9C0K3|ARP3C_HUMAN
sp|P61160|ARP2_HUMAN
sp|P61163|ACTZ_HUMAN
sp|P61201|CSN2_HUMAN
sp|P84077|ARF1_HUMAN;sp|P61204|ARF3_HUMAN
sp|P61221|ABCE1_HUMAN
sp|P61224|RAP1B_HUMAN;sp|A6NIZ1|RP1BL_HUMAN;sp|P62834|RAP1A_HUMAN
sp|P61247|RS3A_HUMAN
sp|P61254|RL26_HUMAN
sp|P61289|PSME3_HUMAN
sp|P61313|RL15_HUMAN
sp|P61421|VA0D1_HUMAN
sp|P61586|RHOA_HUMAN
sp|P61604|CH10_HUMAN
sp|P61626|LYSC_HUMAN
sp|P61769|B2MG_HUMAN
sp|P61812|TGFB2_HUMAN
sp|P61916|NPC2_HUMAN
sp|P61923|COPZ1_HUMAN
sp|P61966|AP1S1_HUMAN
sp|P61970|NTF2_HUMAN
sp|P61978|HNRPK_HUMAN
sp|P61981|1433G_HUMAN
sp|P62070|RRAS2_HUMAN
sp|P62136|PP1A_HUMAN
sp|P62140|PP1B_HUMAN;sp|P36873|PP1G_HUMAN
sp|P62158|CALM_HUMAN
sp|P62191|PRS4_HUMAN
sp|P62195|PRS8_HUMAN;sp|Q8NB90|SPAT5_HUMAN
sp|P62241|RS8_HUMAN
sp|P62244|RS15A_HUMAN
sp|P62249|RS16_HUMAN
sp|P62258|1433E_HUMAN
sp|P62263|RS14_HUMAN
sp|P62269|RS18_HUMAN
sp|P62277|RS13_HUMAN
sp|P62304|RUXE_HUMAN
sp|P62306|RUXF_HUMAN
sp|P62314|SMD1_HUMAN
sp|P62316|SMD2_HUMAN
sp|P62318|SMD3_HUMAN
sp|P62333|PRS10_HUMAN
sp|P62424|RL7A_HUMAN
sp|P62495|ERF1_HUMAN
sp|P62701|RS4X_HUMAN;sp|P22090|RS4Y1_HUMAN;sp|Q8TD47|RS4Y2_HUMAN
sp|P62714|PP2AB_HUMAN;sp|P60510|PP4C_HUMAN
sp|P62750|RL23A_HUMAN
sp|P62753|RS6_HUMAN
sp|P62805|H4_HUMAN
sp|P62826|RAN_HUMAN
sp|P62841|RS15_HUMAN
sp|P62847|RS24_HUMAN
sp|P62851|RS25_HUMAN
sp|P62854|RS26_HUMAN
sp|P62873|GBB1_HUMAN;sp|P16520|GBB3_HUMAN
sp|P62877|RBX1_HUMAN
sp|P62879|GBB2_HUMAN;sp|Q9HAV0|GBB4_HUMAN
sp|P62888|RL30_HUMAN
sp|P62906|RL10A_HUMAN
sp|P62913|RL11_HUMAN
sp|P62937|PPIA_HUMAN;sp|Q9Y536|PAL4A_HUMAN;sp|F5H284|PAL4D_HUMAN
sp|P63000|RAC1_HUMAN
sp|P63010|AP2B1_HUMAN
sp|P63104|1433Z_HUMAN
sp|P63151|2ABA_HUMAN;sp|Q9Y2T4|2ABG_HUMAN;sp|Q66LE6|2ABD_HUMAN;sp|Q00005|2ABB_HUMAN
sp|Q96FJ2|DYL2_HUMAN;sp|P63167|DYL1_HUMAN
sp|P63241|IF5A1_HUMAN;sp|Q6IS14|IF5AL_HUMAN;sp|Q9GZV4|IF5A2_HUMAN
sp|P63244|GBLP_HUMAN
sp|P63261|ACTG_HUMAN
sp|P67775|PP2AA_HUMAN
sp|P67809|YBOX1_HUMAN;sp|Q9Y2T7|YBOX2_HUMAN;sp|P16989|YBOX3_HUMAN
sp|P67870|CSK2B_HUMAN
sp|P68133|ACTS_HUMAN;sp|P68032|ACTC_HUMAN;sp|P63267|ACTH_HUMAN;sp|P62736|ACTA_HUMAN
sp|Q5VTE0|EF1A3_HUMAN;sp|P68104|EF1A1_HUMAN;sp|Q05639|EF1A2_HUMAN
sp|P68363|TBA1B_HUMAN;sp|A6NHL2|TBAL3_HUMAN
sp|P68366|TBA4A_HUMAN
sp|P68371|TBB4B_HUMAN;sp|P04350|TBB4A_HUMAN;sp|Q3ZCM7|TBB8_HUMAN
sp|P68400|CSK21_HUMAN;sp|Q8NEV1|CSK23_HUMAN
sp|Q71DI3|H32_HUMAN;sp|Q16695|H31T_HUMAN;sp|P84243|H33_HUMAN;sp|P68431|H31_HUMAN;sp|Q6NXT2|H3C_HUMAN
sp|P68871|HBB_HUMAN
sp|Q15155|NOMO1_HUMAN;sp|P69849|NOMO3_HUMAN;sp|Q5JPE7|NOMO2_HUMAN
sp|P69905|HBA_HUMAN
sp|P78333|GPC5_HUMAN
sp|P78371|TCPB_HUMAN
sp|P78380|OLR1_HUMAN
sp|P78417|GSTO1_HUMAN
sp|P80188|NGAL_HUMAN
sp|P80303|NUCB2_HUMAN
sp|P80365|DHI2_HUMAN;sp|O00587|MFNG_HUMAN;REV__sp|O00587|MFNG_HUMAN
sp|P80748|LV302_HUMAN
sp|P81605|DCD_HUMAN
sp|P82980|RET5_HUMAN
sp|P84085|ARF5_HUMAN
sp|P84098|RL19_HUMAN
sp|P98082|DAB2_HUMAN
sp|P98095|FBLN2_HUMAN
sp|P98160|PGBM_HUMAN
sp|P98164|LRP2_HUMAN
sp|P99999|CYC_HUMAN;CON__P62894
sp|Q00169|PIPNA_HUMAN
sp|Q00325|MPCP_HUMAN
sp|Q00577|PURA_HUMAN
sp|Q00610|CLH1_HUMAN;sp|P53675|CLH2_HUMAN
sp|Q00688|FKBP3_HUMAN
sp|Q00796|DHSO_HUMAN
sp|Q00839|HNRPU_HUMAN
sp|Q01082|SPTB2_HUMAN
sp|Q01105|SET_HUMAN;sp|P0DME0|SETLP_HUMAN
sp|Q01415|GALK2_HUMAN
sp|Q01433|AMPD2_HUMAN
sp|Q01469|FABP5_HUMAN;sp|A8MUU1|FB5L3_HUMAN
sp|Q01518|CAP1_HUMAN
sp|Q01813|PFKAP_HUMAN
sp|Q02083|NAAA_HUMAN
sp|Q02252|MMSA_HUMAN
sp|Q02413|DSG1_HUMAN
sp|Q02487|DSC2_HUMAN
sp|Q02543|RL18A_HUMAN
sp|Q02750|MP2K1_HUMAN;sp|P36507|MP2K2_HUMAN
sp|Q02790|FKBP4_HUMAN
sp|Q02809|PLOD1_HUMAN
sp|Q02818|NUCB1_HUMAN
sp|Q02878|RL6_HUMAN
sp|Q03154|ACY1_HUMAN
sp|Q03167|TGBR3_HUMAN
sp|Q03591|FHR1_HUMAN;sp|P36980|FHR2_HUMAN;sp|Q9BXR6|FHR5_HUMAN
sp|Q04446|GLGB_HUMAN
sp|Q04637|IF4G1_HUMAN;REV__sp|Q8NEG2|CG057_HUMAN
sp|Q04760|LGUL_HUMAN
sp|Q04828|AK1C1_HUMAN;sp|P52895|AK1C2_HUMAN
sp|Q04917|1433F_HUMAN
sp|Q05707|COEA1_HUMAN
sp|Q06033|ITIH3_HUMAN
sp|Q06124|PTN11_HUMAN
sp|Q06203|PUR1_HUMAN
sp|Q06210|GFPT1_HUMAN;sp|O94808|GFPT2_HUMAN
sp|Q06278|AOXA_HUMAN
sp|Q06323|PSME1_HUMAN
sp|Q06481|APLP2_HUMAN
sp|Q06830|PRDX1_HUMAN
sp|Q07020|RL18_HUMAN
sp|Q07021|C1QBP_HUMAN
sp|Q07075|AMPE_HUMAN
sp|Q07157|ZO1_HUMAN
sp|Q07666|KHDR1_HUMAN
sp|Q07837|SLC31_HUMAN
sp|Q07955|SRSF1_HUMAN
sp|Q07960|RHG01_HUMAN
sp|Q08174|PCDH1_HUMAN
sp|Q08188|TGM3_HUMAN
sp|Q08211|DHX9_HUMAN
sp|Q08257|QOR_HUMAN
sp|Q08345|DDR1_HUMAN
sp|Q08380|LG3BP_HUMAN
sp|Q08431|MFGM_HUMAN
sp|Q08554|DSC1_HUMAN
sp|Q08629|TICN1_HUMAN;sp|Q9BQ16|TICN3_HUMAN
sp|Q68CK6|ACS2B_HUMAN;sp|Q08AH3|ACS2A_HUMAN
sp|Q08AI8|CB054_HUMAN
sp|Q09028|RBBP4_HUMAN;sp|Q16576|RBBP7_HUMAN
sp|Q09328|MGT5A_HUMAN
sp|Q09666|AHNK_HUMAN
sp|Q0VGL1|LTOR4_HUMAN
sp|Q10469|MGAT2_HUMAN
sp|Q10471|GALT2_HUMAN
sp|Q11201|SIA4A_HUMAN
sp|Q11206|SIA4C_HUMAN
sp|Q12765|SCRN1_HUMAN
sp|Q12792|TWF1_HUMAN
sp|Q12794|HYAL1_HUMAN
sp|Q12797|ASPH_HUMAN
sp|Q12805|FBLN3_HUMAN
sp|Q12841|FSTL1_HUMAN
sp|Q12860|CNTN1_HUMAN
sp|Q12882|DPYD_HUMAN
sp|Q12904|AIMP1_HUMAN
sp|Q12905|ILF2_HUMAN
sp|Q12906|ILF3_HUMAN;sp|Q96SI9|STRBP_HUMAN
sp|Q12907|LMAN2_HUMAN
sp|Q12955|ANK3_HUMAN;sp|Q01484|ANK2_HUMAN
sp|Q12959|DLG1_HUMAN
sp|Q13011|ECH1_HUMAN
sp|Q13045|FLII_HUMAN
sp|Q13057|COASY_HUMAN
sp|Q13098|CSN1_HUMAN
sp|Q13126|MTAP_HUMAN
sp|Q13153|PAK1_HUMAN
sp|Q13155|AIMP2_HUMAN
sp|Q13177|PAK2_HUMAN;sp|O75914|PAK3_HUMAN
sp|Q13200|PSMD2_HUMAN
sp|Q13217|DNJC3_HUMAN
sp|Q13219|PAPP1_HUMAN
sp|Q13228|SBP1_HUMAN
sp|Q13268|DHRS2_HUMAN
sp|Q13275|SEM3F_HUMAN
sp|Q13310|PABP4_HUMAN
sp|Q13332|PTPRS_HUMAN
sp|Q13347|EIF3I_HUMAN
sp|Q13409|DC1I2_HUMAN
sp|Q13443|ADAM9_HUMAN
sp|Q13492|PICAL_HUMAN
sp|Q13510|ASAH1_HUMAN
sp|Q13557|KCC2D_HUMAN
sp|Q13564|ULA1_HUMAN
sp|Q13576|IQGA2_HUMAN
sp|Q13591|SEM5A_HUMAN
sp|Q13596|SNX1_HUMAN
sp|Q13616|CUL1_HUMAN
sp|Q13618|CUL3_HUMAN
sp|Q13621|S12A1_HUMAN
sp|Q13630|FCL_HUMAN
sp|Q13751|LAMB3_HUMAN
sp|Q13753|LAMC2_HUMAN
sp|Q13813|SPTN1_HUMAN
sp|Q13822|ENPP2_HUMAN
sp|Q13825|AUHM_HUMAN
sp|Q13835|PKP1_HUMAN
sp|Q13867|BLMH_HUMAN
sp|Q9BVA1|TBB2B_HUMAN;sp|Q13885|TBB2A_HUMAN
sp|Q14019|COTL1_HUMAN
sp|Q14103|HNRPD_HUMAN
sp|Q14108|SCRB2_HUMAN
sp|Q14112|NID2_HUMAN
sp|Q14117|DPYS_HUMAN;sp|Q14195|DPYL3_HUMAN;sp|Q14194|DPYL1_HUMAN
sp|Q14118|DAG1_HUMAN
sp|Q14126|DSG2_HUMAN
sp|Q14152|EIF3A_HUMAN
sp|Q14165|MLEC_HUMAN
sp|Q14166|TTL12_HUMAN
sp|Q14203|DCTN1_HUMAN
sp|Q14204|DYHC1_HUMAN
sp|Q14240|IF4A2_HUMAN
sp|Q14247|SRC8_HUMAN
sp|Q14314|FGL2_HUMAN
sp|Q14353|GAMT_HUMAN
sp|Q14376|GALE_HUMAN
sp|Q14393|GAS6_HUMAN
sp|Q14410|GLPK2_HUMAN
sp|Q14435|GALT3_HUMAN
sp|Q14444|CAPR1_HUMAN
sp|Q14512|FGFP1_HUMAN
sp|Q14515|SPRL1_HUMAN
sp|Q14520|HABP2_HUMAN
sp|Q14574|DSC3_HUMAN
sp|Q14624|ITIH4_HUMAN;CON__Q3T052
sp|Q14651|PLSI_HUMAN
sp|Q14697|GANAB_HUMAN
sp|Q14703|MBTP1_HUMAN
sp|Q14764|MVP_HUMAN
sp|Q14766|LTBP1_HUMAN
sp|Q14767|LTBP2_HUMAN
sp|Q14847|LASP1_HUMAN
sp|Q14894|CRYM_HUMAN
sp|Q14914|PTGR1_HUMAN
sp|Q14974|IMB1_HUMAN
sp|Q14980|NUMA1_HUMAN
sp|Q14C86|GAPD1_HUMAN
sp|Q14CN2|CLCA4_HUMAN;sp|A8K7I4|CLCA1_HUMAN
sp|Q15008|PSMD6_HUMAN
sp|Q15018|F175B_HUMAN
sp|Q15019|SEPT2_HUMAN
sp|Q15046|SYK_HUMAN
sp|Q15075|EEA1_HUMAN
sp|Q15084|PDIA6_HUMAN
sp|Q15102|PA1B3_HUMAN
sp|Q15111|PLCL1_HUMAN
sp|Q15126|PMVK_HUMAN
sp|Q15172|2A5A_HUMAN
sp|Q15181|IPYR_HUMAN
sp|Q15185|TEBP_HUMAN
sp|Q15257|PTPA_HUMAN
sp|Q15274|NADC_HUMAN
sp|Q15365|PCBP1_HUMAN
sp|Q15366|PCBP2_HUMAN;sp|P57721|PCBP3_HUMAN
sp|Q15375|EPHA7_HUMAN;sp|Q5JZY3|EPHAA_HUMAN
sp|Q15389|ANGP1_HUMAN
sp|Q15393|SF3B3_HUMAN
sp|Q15418|KS6A1_HUMAN;sp|Q15349|KS6A2_HUMAN
sp|Q15435|PP1R7_HUMAN
sp|Q15437|SC23B_HUMAN
sp|Q15485|FCN2_HUMAN
sp|Q15582|BGH3_HUMAN
sp|Q15599|NHRF2_HUMAN
sp|Q15631|TSN_HUMAN
sp|Q15642|CIP4_HUMAN
sp|Q15828|CYTM_HUMAN
sp|Q15833|STXB2_HUMAN
sp|Q15846|CLUL1_HUMAN
sp|Q15847|ADIRF_HUMAN
sp|Q15904|VAS1_HUMAN
sp|Q15907|RB11B_HUMAN;sp|P62491|RB11A_HUMAN
sp|Q16181|SEPT7_HUMAN;sp|Q6ZU15|SEP14_HUMAN
sp|Q16186|ADRM1_HUMAN
sp|Q16204|CCDC6_HUMAN
sp|Q16270|IBP7_HUMAN
sp|Q16378|PROL4_HUMAN
sp|Q16401|PSMD5_HUMAN
sp|Q16531|DDB1_HUMAN
sp|Q16537|2A5E_HUMAN;sp|Q15173|2A5B_HUMAN
sp|Q16543|CDC37_HUMAN
sp|Q16555|DPYL2_HUMAN
sp|Q16563|SYPL1_HUMAN
sp|Q16610|ECM1_HUMAN
sp|Q16651|PRSS8_HUMAN
sp|Q16698|DECR_HUMAN
sp|Q16706|MA2A1_HUMAN
sp|Q16719|KYNU_HUMAN
sp|Q16762|THTR_HUMAN
sp|Q16769|QPCT_HUMAN
sp|Q16775|GLO2_HUMAN
sp|Q16827|PTPRO_HUMAN;sp|P23467|PTPRB_HUMAN
sp|Q16832|DDR2_HUMAN
sp|Q16851|UGPA_HUMAN
sp|Q16881|TRXR1_HUMAN
sp|Q1KMD3|HNRL2_HUMAN
sp|Q24JP5|T132A_HUMAN
sp|Q32MZ4|LRRF1_HUMAN
sp|Q3LXA3|DHAK_HUMAN
sp|Q3YEC7|RABL6_HUMAN
sp|Q495M3|S36A2_HUMAN
sp|Q495W5|FUT11_HUMAN
sp|Q4G0P3|HYDIN_HUMAN
sp|Q4LDE5|SVEP1_HUMAN
sp|Q53FA7|QORX_HUMAN
sp|Q53GD3|CTL4_HUMAN
sp|Q53H76|PLA1A_HUMAN
sp|Q53HC0|CCD92_HUMAN
sp|Q53LP3|SWAHC_HUMAN
sp|Q53T59|H1BP3_HUMAN
sp|Q562R1|ACTBL_HUMAN
sp|Q58FF6|H90B4_HUMAN
sp|Q5H8C1|FREM1_HUMAN
sp|Q5IJ48|CRUM2_HUMAN
sp|Q5R3I4|TTC38_HUMAN
sp|Q5SGD2|PPM1L_HUMAN
sp|Q5SRE7|PHYD1_HUMAN
sp|Q5SSJ5|HP1B3_HUMAN
sp|Q5SZK8|FREM2_HUMAN
sp|Q5T0N5|FBP1L_HUMAN
sp|Q5T2W1|NHRF3_HUMAN;sp|A8MUH7|PDZ1P_HUMAN
sp|Q5T4S7|UBR4_HUMAN
sp|Q5T601|AGRF1_HUMAN
sp|Q5T6J7|GNTK_HUMAN
sp|Q5T749|KPRP_HUMAN
sp|Q5T750|XP32_HUMAN
sp|Q5TFE4|NT5D1_HUMAN
sp|Q5VU97|CAHD1_HUMAN
sp|Q5VW32|BROX_HUMAN
sp|Q5VWJ9|SNX30_HUMAN
sp|Q5VWZ2|LYPL1_HUMAN
sp|Q5VZK9|LR16A_HUMAN
sp|Q63HM1|KFA_HUMAN
sp|Q9Y4E1|FA21C_HUMAN;sp|Q641Q2|FA21A_HUMAN
sp|Q641Q3|METRL_HUMAN
sp|Q6B0K9|HBM_HUMAN
sp|Q6EMK4|VASN_HUMAN
sp|Q6IBS0|TWF2_HUMAN
sp|Q6MZW2|FSTL4_HUMAN;sp|Q8N475|FSTL5_HUMAN
sp|Q6N022|TEN4_HUMAN;sp|Q9P273|TEN3_HUMAN
sp|Q6NUM9|RETST_HUMAN
sp|Q6NVY1|HIBCH_HUMAN
sp|Q6P4A8|PLBL1_HUMAN
sp|Q6P531|GGT6_HUMAN
sp|Q6P9A2|GLT18_HUMAN
sp|Q6PCB0|VWA1_HUMAN
sp|Q6PK18|OGFD3_HUMAN
sp|Q6UVK1|CSPG4_HUMAN
sp|Q6UWP8|SBSN_HUMAN
sp|Q6UWR7|ENPP6_HUMAN
sp|Q6UWY0|ARSK_HUMAN
sp|Q6UX06|OLFM4_HUMAN
sp|Q6UX72|B3GN9_HUMAN
sp|Q6UX73|CP089_HUMAN;sp|Q6NSJ2|PHLB3_HUMAN
sp|Q6UXI9|NPNT_HUMAN
sp|Q6V0I7|FAT4_HUMAN
sp|Q6WRI0|IGS10_HUMAN
sp|Q6XQN6|PNCB_HUMAN
sp|Q6YP21|KAT3_HUMAN
sp|Q6ZMR5|TM11A_HUMAN
sp|Q6ZN66|GBP6_HUMAN
sp|Q6ZVX7|FBX50_HUMAN
sp|Q6ZWJ8|KCP_HUMAN
sp|Q709C8|VP13C_HUMAN
sp|Q71U36|TBA1A_HUMAN;sp|Q9BQE3|TBA1C_HUMAN;sp|Q6PEY2|TBA3E_HUMAN;sp|Q13748|TBA3C_HUMAN;sp|Q9NY65|TBA8_HUMAN
sp|Q7KZF4|SND1_HUMAN
sp|Q7L1Q6|BZW1_HUMAN
sp|Q7L1V2|MON1B_HUMAN
sp|Q7L266|ASGL1_HUMAN
sp|Q7L576|CYFP1_HUMAN
sp|Q7L5L3|GDPD3_HUMAN
sp|Q7L5N1|CSN6_HUMAN
sp|Q7L5Y1|ENOF1_HUMAN
sp|Q9H8S9|MOB1A_HUMAN;sp|Q7L9L4|MOB1B_HUMAN
sp|Q7LGC8|CHST3_HUMAN
sp|Q7RTZ1|OVCH2_HUMAN
sp|Q7Z304|MAMC2_HUMAN
sp|Q7Z406|MYH14_HUMAN
sp|Q7Z4W1|DCXR_HUMAN
sp|Q7Z5L0|VMO1_HUMAN
sp|Q7Z5L7|PODN_HUMAN
sp|Q7Z6Z7|HUWE1_HUMAN
sp|Q7Z7G0|TARSH_HUMAN
sp|Q7Z7M0|MEGF8_HUMAN
sp|Q86SF2|GALT7_HUMAN
sp|Q86SR1|GLT10_HUMAN;sp|Q49A17|GLTL6_HUMAN
sp|Q86T13|CLC14_HUMAN
sp|Q86TH1|ATL2_HUMAN
sp|Q86U10|LPP60_HUMAN
sp|Q86U17|SPA11_HUMAN
sp|Q86UD1|OAF_HUMAN
sp|Q86UN2|R4RL1_HUMAN
sp|Q86UN3|R4RL2_HUMAN
sp|Q86UP2|KTN1_HUMAN
sp|Q86UX2|ITIH5_HUMAN
sp|Q86V85|GP180_HUMAN
sp|Q86VN1|VPS36_HUMAN
sp|Q86VP6|CAND1_HUMAN
sp|Q86VR7|VS10L_HUMAN
sp|Q86X76|NIT1_HUMAN
sp|Q86YB7|ECHD2_HUMAN
sp|Q8IUL8|CILP2_HUMAN
sp|Q8IUX7|AEBP1_HUMAN
sp|Q8IV08|PLD3_HUMAN
sp|Q8IW45|NNRD_HUMAN
sp|Q8IW75|SPA12_HUMAN
sp|Q8IWA5|CTL2_HUMAN
sp|Q8IWU5|SULF2_HUMAN
sp|Q8IXL6|DMP4_HUMAN;sp|Q96MK3|FA20A_HUMAN
sp|Q8IYT4|KATL2_HUMAN
sp|Q8IZ83|A16A1_HUMAN
sp|Q8IZJ3|CPMD8_HUMAN
sp|Q8IZP0|ABI1_HUMAN;sp|Q9NYB9|ABI2_HUMAN
sp|Q8N0V4|LGI2_HUMAN
sp|Q8N0V5|GNT2A_HUMAN;sp|Q06430|GNT2B_HUMAN;sp|Q8NFS9|GNT2C_HUMAN
sp|Q8N0W3|FUK_HUMAN
sp|Q8N142|PURA1_HUMAN
sp|Q8N163|CCAR2_HUMAN
sp|Q8N1G4|LRC47_HUMAN
sp|Q8N2C7|UNC80_HUMAN
sp|Q8N2U0|TM256_HUMAN
sp|Q8N307|MUC20_HUMAN
sp|Q8N335|GPD1L_HUMAN
sp|Q8N3R9|MPP5_HUMAN
sp|Q8N428|GLT16_HUMAN
sp|Q8N436|CPXM2_HUMAN
sp|Q8N474|SFRP1_HUMAN
sp|Q8N6Q3|CD177_HUMAN
sp|Q8N9F0|NAT8L_HUMAN
sp|Q8NBF2|NHLC2_HUMAN
sp|Q8NBJ4|GOLM1_HUMAN
sp|Q8NBS9|TXND5_HUMAN
sp|Q8NBZ7|UXS1_HUMAN
sp|Q8NC51|PAIRB_HUMAN
sp|Q8NCC3|PAG15_HUMAN
sp|Q8NCH0|CHSTE_HUMAN
sp|Q8NCL4|GALT6_HUMAN
sp|Q8NCW5|NNRE_HUMAN
sp|Q8NDH3|PEPL1_HUMAN
sp|Q8NFT6|DBF4B_HUMAN
sp|Q8NFU4|FDSCP_HUMAN
sp|Q8NFY4|SEM6D_HUMAN;sp|Q9H2E6|SEM6A_HUMAN
sp|Q8NHH1|TTL11_HUMAN
sp|Q8NHJ6|LIRB4_HUMAN
sp|Q8NHP8|PLBL2_HUMAN
sp|Q8NHY0|B4GN2_HUMAN
sp|Q8NI32|LPD6B_HUMAN
sp|Q8NI99|ANGL6_HUMAN
sp|Q8TAT6|NPL4_HUMAN
sp|Q8TB73|NDNF_HUMAN
sp|Q8TB96|TIP_HUMAN
sp|Q8TBF2|PGFS_HUMAN
sp|Q8TBX8|PI42C_HUMAN
sp|Q8TCD5|NT5C_HUMAN
sp|Q8TD19|NEK9_HUMAN
sp|Q8TDL5|BPIB1_HUMAN
sp|Q8TDX5|ACMSD_HUMAN
sp|Q8TEA8|DTD1_HUMAN
sp|Q8TER0|SNED1_HUMAN
sp|Q8TEX9|IPO4_HUMAN
sp|Q8TF65|GIPC2_HUMAN
sp|Q8TF66|LRC15_HUMAN
sp|Q8WUM0|NU133_HUMAN
sp|Q8WUM4|PDC6I_HUMAN
sp|Q8WV92|MITD1_HUMAN
sp|Q8WVM8|SCFD1_HUMAN
sp|Q8WVN6|SCTM1_HUMAN
sp|Q8WVQ1|CANT1_HUMAN
sp|Q8WWA0|ITLN1_HUMAN;sp|Q8WWU7|ITLN2_HUMAN
sp|Q8WWI5|CTL1_HUMAN
sp|Q8WWY8|LIPH_HUMAN
sp|Q8WZ42|TITIN_HUMAN
sp|Q8WZ75|ROBO4_HUMAN
sp|Q8WZA1|PMGT1_HUMAN
sp|Q92485|ASM3B_HUMAN
sp|Q92499|DDX1_HUMAN
sp|Q92520|FAM3C_HUMAN
sp|Q92522|H1X_HUMAN
sp|Q92542|NICA_HUMAN
sp|Q92563|TICN2_HUMAN
sp|Q92597|NDRG1_HUMAN
sp|Q92598|HS105_HUMAN
sp|Q92673|SORL_HUMAN
sp|Q92692|PVRL2_HUMAN
sp|Q92696|PGTA_HUMAN
sp|Q92743|HTRA1_HUMAN
sp|Q92747|ARC1A_HUMAN
sp|Q92765|SFRP3_HUMAN
sp|Q92817|EVPL_HUMAN
sp|Q92820|GGH_HUMAN
sp|Q92832|NELL1_HUMAN
sp|Q92838|EDA_HUMAN
sp|Q92854|SEM4D_HUMAN
sp|Q92876|KLK6_HUMAN
sp|Q92896|GSLG1_HUMAN
sp|Q92900|RENT1_HUMAN
sp|Q92930|RAB8B_HUMAN
sp|Q93008|USP9X_HUMAN
sp|Q93009|UBP7_HUMAN
sp|Q93034|CUL5_HUMAN
sp|Q93088|BHMT1_HUMAN
sp|Q93099|HGD_HUMAN
sp|Q95604|1C17_HUMAN
sp|Q969E1|LEAP2_HUMAN
sp|Q969J3|L12R1_HUMAN
sp|Q969P0|IGSF8_HUMAN
sp|Q969X1|LFG3_HUMAN
sp|Q96A11|G3ST3_HUMAN
sp|Q96AC1|FERM2_HUMAN;sp|Q9BQL6|FERM1_HUMAN
sp|Q96AM1|MRGRF_HUMAN
sp|Q96BW5|PTER_HUMAN
sp|Q96C11|FGGY_HUMAN
sp|Q9BUP0|EFHD1_HUMAN;sp|Q96C19|EFHD2_HUMAN
sp|Q96C23|GALM_HUMAN
sp|Q96CN7|ISOC1_HUMAN
sp|Q96CV9|OPTN_HUMAN
sp|Q96CW1|AP2M1_HUMAN
sp|Q96DA0|ZG16B_HUMAN
sp|Q96DG6|CMBL_HUMAN
sp|Q96EM0|T3HPD_HUMAN
sp|Q96EU7|C1GLC_HUMAN
sp|Q96F07|CYFP2_HUMAN
sp|Q96F10|SAT2_HUMAN
sp|Q96FC7|PHIPL_HUMAN
sp|Q96FL9|GLT14_HUMAN
sp|Q96FQ6|S10AG_HUMAN
sp|Q96FV2|SCRN2_HUMAN
sp|Q96FW1|OTUB1_HUMAN
sp|Q96G03|PGM2_HUMAN
sp|Q96GA7|SDSL_HUMAN
sp|Q96GC5|RM48_HUMAN
sp|Q96GD0|PLPP_HUMAN
sp|Q96H20|SNF8_HUMAN
sp|Q96HD9|ACY3_HUMAN
sp|Q96HE7|ERO1A_HUMAN
sp|Q96I15|SCLY_HUMAN
sp|Q96IJ6|GMPPA_HUMAN
sp|Q96IU4|ABHEB_HUMAN
sp|Q96IY4|CBPB2_HUMAN;CON__Q2KIG3
sp|Q96JQ0|PCD16_HUMAN
sp|Q96K17|BT3L4_HUMAN
sp|Q96KP4|CNDP2_HUMAN
sp|Q96KR4|LMLN_HUMAN
sp|Q96L46|CPNS2_HUMAN
sp|Q96MM7|H6ST2_HUMAN;sp|O60243|H6ST1_HUMAN;sp|Q8IZP7|H6ST3_HUMAN
sp|Q9BZ76|CNTP3_HUMAN;sp|Q96NU0|CNT3B_HUMAN
sp|Q96NU7|HUTI_HUMAN
sp|Q96NY8|PVRL4_HUMAN
sp|Q96P63|SPB12_HUMAN
sp|Q96PD5|PGRP2_HUMAN;CON__ENSEMBL:ENSBTAP00000016285
sp|Q96PX8|SLIK1_HUMAN
sp|Q96QK1|VPS35_HUMAN
sp|Q96RT1|LAP2_HUMAN
sp|Q96RU3|FNBP1_HUMAN
sp|Q96RW7|HMCN1_HUMAN
sp|Q96S16|JMJD8_HUMAN
sp|Q96TA1|NIBL1_HUMAN
sp|Q99062|CSF3R_HUMAN
sp|Q99102|MUC4_HUMAN
sp|Q99436|PSB7_HUMAN
sp|Q99447|PCY2_HUMAN
sp|Q99460|PSMD1_HUMAN
sp|Q99497|PARK7_HUMAN
sp|Q99519|NEUR1_HUMAN
sp|Q99523|SORT_HUMAN
sp|Q99536|VAT1_HUMAN
sp|Q99538|LGMN_HUMAN
sp|Q99574|NEUS_HUMAN
sp|Q99584|S10AD_HUMAN
sp|Q99598|TSNAX_HUMAN
sp|Q99623|PHB2_HUMAN
sp|Q99627|CSN8_HUMAN
sp|Q99715|COCA1_HUMAN
sp|Q99733|NP1L4_HUMAN
sp|Q99798|ACON_HUMAN
sp|Q99816|TS101_HUMAN
sp|Q99829|CPNE1_HUMAN
sp|Q99832|TCPH_HUMAN
sp|Q99873|ANM1_HUMAN
sp|Q99941|ATF6B_HUMAN
sp|Q99962|SH3G2_HUMAN;sp|Q99961|SH3G1_HUMAN
sp|Q99969|RARR2_HUMAN
sp|Q99983|OMD_HUMAN
sp|Q99985|SEM3C_HUMAN
sp|Q99988|GDF15_HUMAN
sp|Q99999|G3ST1_HUMAN
sp|Q9BPW8|NIPS1_HUMAN
sp|Q9BPX5|ARP5L_HUMAN
sp|Q9BQ51|PD1L2_HUMAN
sp|Q9BQT9|CSTN3_HUMAN
sp|Q9BR76|COR1B_HUMAN;sp|A9Z1Z3|FR1L4_HUMAN
sp|Q9BRF8|CPPED_HUMAN
sp|Q9BRG1|VPS25_HUMAN
sp|Q9BRK3|MXRA8_HUMAN
sp|Q9BRK5|CAB45_HUMAN
sp|Q9BRT3|MIEN1_HUMAN
sp|Q9BS26|ERP44_HUMAN
sp|Q9BSE5|SPEB_HUMAN
sp|Q9BST9|RTKN_HUMAN
sp|Q9BT78|CSN4_HUMAN
sp|Q9BTE6|AASD1_HUMAN
sp|Q9BTW9|TBCD_HUMAN
sp|Q9BTY2|FUCO2_HUMAN
sp|Q9BTZ2|DHRS4_HUMAN;sp|P0CG22|DR4L1_HUMAN
sp|Q9BUJ0|ABHEA_HUMAN
sp|Q9BUL8|PDC10_HUMAN
sp|Q9BUN1|MENT_HUMAN
sp|Q9BUT1|BDH2_HUMAN
sp|Q9BV20|MTNA_HUMAN
sp|Q9BVJ7|DUS23_HUMAN
sp|Q9BVM4|GGACT_HUMAN
sp|Q9BW04|SARG_HUMAN
sp|Q9BWD1|THIC_HUMAN
sp|Q9BWS9|CHID1_HUMAN
sp|Q9BXJ0|C1QT5_HUMAN
sp|Q9BXP8|PAPP2_HUMAN
sp|Q9BXS5|AP1M1_HUMAN;sp|Q9Y6Q5|AP1M2_HUMAN
sp|Q9BXU0|TEX12_HUMAN
sp|Q9BY67|CADM1_HUMAN
sp|Q9BYE9|CDHR2_HUMAN
sp|Q9BYF1|ACE2_HUMAN
sp|Q9BZG9|LYNX1_HUMAN
sp|Q9BZM4|N2DL3_HUMAN
sp|Q9C037|TRIM4_HUMAN
sp|Q9GZM7|TINAL_HUMAN
sp|Q9GZP0|PDGFD_HUMAN
sp|Q9GZP4|PITH1_HUMAN
sp|Q9GZV1|ANKR2_HUMAN
sp|Q9H008|LHPP_HUMAN
sp|Q9H095|IQCG_HUMAN
sp|Q9H0E2|TOLIP_HUMAN
sp|Q9H0U4|RAB1B_HUMAN;sp|P62820|RAB1A_HUMAN;sp|Q92928|RAB1C_HUMAN
sp|Q9H0W9|CK054_HUMAN
sp|Q9H0X4|ITFG3_HUMAN
sp|Q9H159|CAD19_HUMAN
sp|Q9H173|SIL1_HUMAN
sp|Q9H190|SDCB2_HUMAN
sp|Q9H1B5|XYLT2_HUMAN
sp|Q9H1E1|RNAS7_HUMAN
sp|Q9H223|EHD4_HUMAN
sp|Q9H254|SPTN4_HUMAN
sp|Q9H2A2|AL8A1_HUMAN
sp|Q9H2G2|SLK_HUMAN
sp|Q9H2M3|BHMT2_HUMAN
sp|Q9H2U2|IPYR2_HUMAN
sp|Q9H3G5|CPVL_HUMAN
sp|Q9H3S1|SEM4A_HUMAN
sp|Q9H3T2|SEM6C_HUMAN
sp|Q9H3U1|UN45A_HUMAN
sp|Q9H444|CHM4B_HUMAN
sp|Q9H479|FN3K_HUMAN
sp|Q9H4A4|AMPB_HUMAN
sp|Q9H4F8|SMOC1_HUMAN
sp|Q9H4G0|E41L1_HUMAN;sp|O43491|E41L2_HUMAN
sp|Q9H4M9|EHD1_HUMAN;sp|Q9NZN3|EHD3_HUMAN;sp|Q9NZN4|EHD2_HUMAN
sp|Q9H6S3|ES8L2_HUMAN
sp|Q9H6X2|ANTR1_HUMAN
sp|Q9H8H3|MET7A_HUMAN
sp|Q9H8L6|MMRN2_HUMAN
sp|Q9H993|ARMT1_HUMAN
sp|Q9H9S5|FKRP_HUMAN
sp|Q9H9T3|ELP3_HUMAN
sp|Q9HA64|KT3K_HUMAN
sp|Q9HAB8|PPCS_HUMAN
sp|Q9HAN9|NMNA1_HUMAN
sp|Q9HAT2|SIAE_HUMAN
sp|Q9HB07|MYG1_HUMAN
sp|Q9HB19|PKHA2_HUMAN
sp|Q9HB40|RISC_HUMAN
sp|Q9HB63|NET4_HUMAN
sp|Q9HB71|CYBP_HUMAN
sp|Q9HBB8|CDHR5_HUMAN
sp|Q9HBJ8|TMM27_HUMAN
sp|Q9HC35|EMAL4_HUMAN
sp|Q9HC84|MUC5B_HUMAN
sp|Q9HC98|NEK6_HUMAN
sp|Q9HCC0|MCCB_HUMAN
sp|Q9HCE6|ARGAL_HUMAN;sp|O15013|ARHGA_HUMAN
sp|Q9HCN6|GPVI_HUMAN
sp|Q9HCY8|S10AE_HUMAN
sp|Q9HD42|CHM1A_HUMAN
sp|Q9HD89|RETN_HUMAN
sp|Q9HDC9|APMAP_HUMAN
sp|Q9NP55|BPIA1_HUMAN
sp|Q9NP72|RAB18_HUMAN
sp|Q9NP79|VTA1_HUMAN
sp|Q9NPG4|PCD12_HUMAN;sp|O14917|PCD17_HUMAN
sp|Q9NPR2|SEM4B_HUMAN
sp|Q9NQ36|SCUB2_HUMAN;sp|Q8IWY4|SCUB1_HUMAN
sp|Q9NQ38|ISK5_HUMAN
sp|Q9NQ79|CRAC1_HUMAN
sp|Q9NQ84|GPC5C_HUMAN
sp|Q9NQC3|RTN4_HUMAN
sp|Q9NQR4|NIT2_HUMAN
sp|Q9NQT8|KI13B_HUMAN
sp|Q9NQW7|XPP1_HUMAN
sp|Q9NQX3|GEPH_HUMAN
sp|Q9NR34|MA1C1_HUMAN
sp|Q9NR45|SIAS_HUMAN
sp|Q9NR99|MXRA5_HUMAN
sp|Q9NRA1|PDGFC_HUMAN
sp|Q9NRN7|ADPPT_HUMAN
sp|Q9NRX4|PHP14_HUMAN
sp|Q9NRX5|SERC1_HUMAN
sp|Q9NS15|LTBP3_HUMAN
sp|Q9NS86|LANC2_HUMAN
sp|Q9NSK0|KLC4_HUMAN
sp|Q9NTK5|OLA1_HUMAN
sp|Q9NTX5|ECHD1_HUMAN
sp|Q9NU53|GINM1_HUMAN
sp|Q9NUU7|DD19A_HUMAN;sp|Q9UMR2|DD19B_HUMAN
sp|Q9NVA2|SEP11_HUMAN;sp|Q14141|SEPT6_HUMAN
sp|Q9NVE7|PANK4_HUMAN
sp|Q9NVS9|PNPO_HUMAN
sp|Q9NXG2|THUM1_HUMAN
sp|Q9NY33|DPP3_HUMAN
sp|Q9NY97|B3GN2_HUMAN
sp|Q9NYQ3|HAOX2_HUMAN
sp|Q9NYU2|UGGG1_HUMAN
sp|Q9NYV6|RRN3_HUMAN
sp|Q9NZ08|ERAP1_HUMAN
sp|Q9NZD2|GLTP_HUMAN
sp|Q9NZH0|GPC5B_HUMAN
sp|Q9NZJ9|NUDT4_HUMAN;sp|Q96G61|NUD11_HUMAN;sp|Q8NFP7|NUD10_HUMAN
sp|Q9NZL9|MAT2B_HUMAN
sp|Q9NZP8|C1RL_HUMAN
sp|Q9NZT1|CALL5_HUMAN
sp|Q9NZV1|CRIM1_HUMAN
sp|Q9NZZ3|CHMP5_HUMAN
sp|Q9P0G3|KLK14_HUMAN
sp|Q9P0K1|ADA22_HUMAN
sp|Q9P2E2|KIF17_HUMAN;sp|O15066|KIF3B_HUMAN;sp|O14782|KIF3C_HUMAN;sp|Q9BVG8|KIFC3_HUMAN
sp|Q9P2E9|RRBP1_HUMAN;sp|Q8N4C6|NIN_HUMAN
sp|Q9P2J5|SYLC_HUMAN
sp|Q9P2K2|TXD16_HUMAN
sp|Q9P2T1|GMPR2_HUMAN
sp|Q9UBC9|SPRR3_HUMAN
sp|Q9UBG3|CRNN_HUMAN
sp|Q9UBI6|GBG12_HUMAN
sp|Q9UBN7|HDAC6_HUMAN
sp|Q9UBQ0|VPS29_HUMAN
sp|Q9UBQ6|EXTL2_HUMAN
sp|Q9UBQ7|GRHPR_HUMAN
sp|Q9UBR1|BUP1_HUMAN
sp|Q9UBR2|CATZ_HUMAN
sp|Q9UBW8|CSN7A_HUMAN
sp|Q9UBX1|CATF_HUMAN
sp|Q9UBX5|FBLN5_HUMAN
sp|Q9UDY2|ZO2_HUMAN
sp|Q9UEF7|KLOT_HUMAN
sp|Q9UEY8|ADDG_HUMAN
sp|Q9UFN0|NPS3A_HUMAN
sp|Q9UGB7|MIOX_HUMAN
sp|Q9UGI8|TES_HUMAN
sp|Q9UGM3|DMBT1_HUMAN
sp|Q9UGM5|FETUB_HUMAN
sp|Q9UGT4|SUSD2_HUMAN
sp|Q9UGU0|TCF20_HUMAN
sp|Q9UHD1|CHRD1_HUMAN
sp|Q9UHF0|TKNK_HUMAN
sp|Q9UHG2|PCSK1_HUMAN;sp|Q9NPY3|C1QR1_HUMAN
sp|Q9UHG3|PCYOX_HUMAN
sp|Q9UHJ6|SHPK_HUMAN
sp|Q9UHL4|DPP2_HUMAN
sp|Q9UI12|VATH_HUMAN
sp|Q9UI42|CBPA4_HUMAN
sp|Q9UIA9|XPO7_HUMAN
sp|Q9UIB8|SLAF5_HUMAN
sp|Q9UIV8|SPB13_HUMAN
sp|Q9UJ68|MSRA_HUMAN
sp|Q9UJ70|NAGK_HUMAN
sp|Q9UJJ9|GNPTG_HUMAN
sp|Q9UJU6|DBNL_HUMAN
sp|Q9UK22|FBX2_HUMAN
sp|Q9UK55|ZPI_HUMAN
sp|Q9UK61|F208A_HUMAN
sp|Q9UKG1|DP13A_HUMAN
sp|Q9UKK3|PARP4_HUMAN
sp|Q9UKM7|MA1B1_HUMAN
sp|Q9UKR3|KLK13_HUMAN
sp|Q9UKU6|TRHDE_HUMAN
sp|Q9UKU9|ANGL2_HUMAN
sp|Q9UL25|RAB21_HUMAN
sp|Q9UL46|PSME2_HUMAN
sp|Q9UL52|TM11E_HUMAN
sp|Q9ULA0|DNPEP_HUMAN
sp|Q9ULC6|PADI1_HUMAN
sp|Q9ULP9|TBC24_HUMAN
sp|Q9ULV4|COR1C_HUMAN
sp|Q9UM07|PADI4_HUMAN;sp|Q2KJY2|KI26B_HUMAN
sp|Q9UM21|MGT4A_HUMAN
sp|Q9UM54|MYO6_HUMAN
sp|Q9UMR5|PPT2_HUMAN
sp|Q9UN19|DAPP1_HUMAN
sp|Q9UN36|NDRG2_HUMAN
sp|Q9UN37|VPS4A_HUMAN
sp|Q9UN66|PCDB8_HUMAN;sp|Q9Y5F0|PCDBD_HUMAN;sp|Q9NRJ7|PCDBG_HUMAN;sp|Q9Y5E2|PCDB7_HUMAN;sp|Q9Y5E5|PCDB4_HUMAN;sp|Q9Y5F2|PCDBB_HUMAN;sp|Q9UN67|PCDBA_HUMAN;sp|Q96TA0|PCDBI_HUMAN;sp|Q9Y5E8|PCDBF_HUMAN;sp|Q9Y5E3|PCDB6_HUMAN;sp|Q9Y5F1|PCDBC_HUMAN;sp|Q9Y5E1|PCDB9_HUMAN;sp|Q9Y5E9|PCDBE_HUMAN;sp|Q9Y5G0|PCDGH_HUMAN;sp|Q9Y5G3|PCDGD_HUMAN;sp|Q9Y5G2|PCDGE_HUMAN
sp|Q9UN70|PCDGK_HUMAN
sp|Q9UN73|PCDA6_HUMAN;sp|Q9Y5H6|PCDA8_HUMAN;sp|Q9Y5I1|PCDAB_HUMAN;sp|Q9Y5I3|PCDA1_HUMAN
sp|Q9UNF0|PACN2_HUMAN
sp|Q9UNH7|SNX6_HUMAN
sp|Q9UNM6|PSD13_HUMAN
sp|Q9UNN8|EPCR_HUMAN
sp|Q9UNS2|CSN3_HUMAN
sp|Q9UNW1|MINP1_HUMAN
sp|Q9UPQ3|AGAP1_HUMAN
sp|Q9UPZ6|THS7A_HUMAN
sp|Q9UQ13|SHOC2_HUMAN
sp|Q9UQ53|MGT4B_HUMAN
sp|Q9UQ80|PA2G4_HUMAN
sp|Q9UQB8|BAIP2_HUMAN
sp|Q9Y224|CN166_HUMAN
sp|Q9Y230|RUVB2_HUMAN
sp|Q9Y262|EIF3L_HUMAN
sp|Q9Y265|RUVB1_HUMAN
sp|Q9Y274|SIA10_HUMAN
sp|Q9Y277|VDAC3_HUMAN
sp|Q9Y281|COF2_HUMAN
sp|Q9Y285|SYFA_HUMAN
sp|Q9Y287|ITM2B_HUMAN
sp|Q9Y295|DRG1_HUMAN
sp|Q9Y2A7|NCKP1_HUMAN
sp|Q9Y2A9|B3GN3_HUMAN
sp|Q9Y2E5|MA2B2_HUMAN
sp|Q9Y2J2|E41L3_HUMAN
sp|Q9Y2J8|PADI2_HUMAN
sp|Q9Y2Q3|GSTK1_HUMAN
sp|Q9Y2S2|CRYL1_HUMAN
sp|Q9Y2T3|GUAD_HUMAN
sp|Q9Y303|NAGA_HUMAN
sp|Q9Y315|DEOC_HUMAN
sp|Q9Y334|VWA7_HUMAN
sp|Q9Y365|PCTL_HUMAN
sp|Q9Y376|CAB39_HUMAN;sp|Q9H9S4|CB39L_HUMAN
sp|Q9Y3A5|SBDS_HUMAN
sp|Q9Y3F4|STRAP_HUMAN
sp|Q9Y3I0|RTCB_HUMAN
sp|Q9Y3Q0|NALD2_HUMAN
sp|Q9Y490|TLN1_HUMAN;sp|Q9Y4G6|TLN2_HUMAN
sp|Q9Y4F4|F179B_HUMAN
sp|Q9Y4K0|LOXL2_HUMAN
sp|Q9Y4L1|HYOU1_HUMAN
sp|Q9Y512|SAM50_HUMAN
sp|Q9Y570|PPME1_HUMAN
sp|Q9Y5C1|ANGL3_HUMAN
sp|Q9Y5E6|PCDB3_HUMAN
sp|Q9Y5F6|PCDGM_HUMAN
sp|Q9Y5H5|PCDA9_HUMAN
sp|Q9Y5H8|PCDA3_HUMAN
sp|Q9Y5K6|CD2AP_HUMAN
sp|Q9Y5K8|VATD_HUMAN
sp|Q9Y5P6|GMPPB_HUMAN
sp|Q9Y5S2|MRCKB_HUMAN
sp|Q9Y5X1|SNX9_HUMAN
sp|Q9Y5X3|SNX5_HUMAN
sp|Q9Y5X9|LIPE_HUMAN
sp|Q9Y5Y6|ST14_HUMAN
sp|Q9Y617|SERC_HUMAN
sp|Q9Y646|CBPQ_HUMAN
sp|Q9Y653|GPR56_HUMAN
sp|Q9Y678|COPG1_HUMAN;sp|Q9UBF2|COPG2_HUMAN
sp|Q9Y696|CLIC4_HUMAN
sp|Q9Y6N5|SQRD_HUMAN
sp|Q9Y6N9|USH1C_HUMAN
sp|Q9Y6R7|FCGBP_HUMAN
sp|Q9Y6U3|ADSV_HUMAN
sp|Q9Y6W5|WASF2_HUMAN
