# Supplementary material for: A new urinary exosome enrichment method by a combination of ultrafiltration and TiO2 nanoparticles
Source: Royal Society of Chemistry journal article supplement (doi:10.1039/d1ay00102g), 2021-01-01
Supplement: d1ay00102g3.xlsx [file d1ay00102g3.xlsx]

## Sheet: 30 differential proteins
Protein IDs	Accession	Protein names	Molecular function	Biological process
O15258	RER1	Protein RER1	acetylcholine receptor binding	positive regulation of protein localization to plasma membrane
O60449	LY75	Lymphocyte antigen 75	Receptor	Endocytosis
P01023	A2M	Alpha-2-macroglobulin	Protease inhibitor, Serine protease inhibitor	blood coagulation, intrinsic pathway;stem cell differentiation;platelet degranulation
P04275	VWF	von Willebrand factor	collagen binding	Blood coagulation, Cell adhesion, Hemostasis
P07288	KLK3	Prostate-specific antigen	Hydrolase, Protease, Serine protease	antibacterial peptide production;cellular protein metabolic process;zymogen activation
P12110	COL6A2	Collagen alpha-2(VI) chain	collagen binding	Cell adhesion
P15309	ACP3	Prostatic acid phosphatase	Hydrolase	adenosine metabolic process,nucleotide metabolic process
P18054	ALOX12	Polyunsaturated fatty acid lipoxygenase ALOX12	Dioxygenase, Hydrolase, Oxidoreductase	Fatty acid metabolism, Lipid metabolism
P20336	RAB3A	Ras-related protein Rab-3A	ATPase activator activity,GTPase activity	Exocytosis, Protein transport, Transport
P32004	L1CAM	Neural cell adhesion molecule L1	Developmental protein	Cell adhesion, Differentiation, Neurogenesis
P43251	BTD	Biotinidase	Hydrolase	biotin metabolic process,central nervous system development
P47929	LGALS7	Galectin-7	carbohydrate binding,galactoside binding	Apoptosis
P61289	PSME3	Proteasome activator complex subunit 3	endopeptidase activator activity,identical protein binding	Apoptosis, Cell cycle, Host-virus interaction
P63241	EIF5A	Eukaryotic translation initiation factor 5A-1	Elongation factor, RNA-binding	mRNA transport, Protein biosynthesis, Protein transport, Translocation, Transport
Q10567	AP1B1	AP-1 complex subunit beta-1	clathrin binding,protein kinase binding	Protein transport, Transport
Q15185	PTGES3	Prostaglandin E synthase 3	Chaperone, Isomerase	Fatty acid biosynthesis, Fatty acid metabolism, Lipid biosynthesis, Lipid metabolism, Prostaglandin biosynthesis, Prostaglandin metabolism
Q15836	VAMP3	Vesicle-associated membrane protein 3	SNAP receptor activity,syntaxin binding	Protein transport, Transport
Q5T749	KPRP	Keratinocyte proline-rich protein
Q6YP21	KYAT3	Kynurenine--oxoglutarate transaminase 3	Aminotransferase, Lyase, Transferase	2-oxoglutarate metabolic process,cellular amino acid metabolic process,kynurenine metabolic process
Q8IYJ3	SYTL1	Synaptotagmin-like protein 1	neurexin family protein binding	Exocytosis
Q8WV92	MITD1	MIT domain-containing protein 1	phosphatidylinositol binding,identical protein binding	Cell cycle, Cell division, Transport
Q8WWY8	LIPH	Lipase member H	Heparin-binding, Hydrolase	Lipid degradation, Lipid metabolism
Q9BTE1	DCTN5	Dynactin subunit 5		Transport,aorta development
Q9BY32	ITPA	Inosine triphosphate pyrophosphatase	Hydrolase	Nucleotide metabolism
Q9BZ76	CNTNAP3	Contactin-associated protein-like 3		Cell adhesion
Q9H159	CDH19	Cadherin-19	cadherin binding;calcium ion binding	Cell adhesion
Q9P2E2	KIF17	Kinesin-like protein KIF17	Motor protein	Protein transport, Transport
Q9P2E9	RRBP1	Ribosome-binding protein 1	RNA binding, signaling receptor activity	Protein transport, Translocation, Transport
Q9UKG1	APPL1	DCC-interacting protein 13-alpha	Multifunctional adapter protein that binds to various membrane receptors, nuclear factors and signaling proteins	Cell cycle
Q9Y241	HIGD1A	HIG1 domain family member 1A, mitochondrial	protein binding	Electron transport, Respiratory chain, Stress response, Transport
