# Supplementary material for: A new urinary exosome enrichment method by a combination of ultrafiltration and TiO2 nanoparticles
Source: Royal Society of Chemistry journal article supplement (doi:10.1039/d1ay00102g), 2021-01-01
Supplement: d1ay00102g4.pdf [file d1ay00102g4.pdf]

## **A new urinary exosome enrichment method by a combination of ultrafiltration and TiO<sub>2</sub> nanoparticles**

Xiaochao Xiang<sup>a</sup>, Fulin Guan<sup>ab</sup>, Fenglong Jiao<sup>a</sup>, Hang Li<sup>\*a</sup>, Wanjun Zhang<sup>\*a</sup>,

Yangjun Zhang<sup>\*a</sup> and Weijie Qin<sup>a</sup>

a National Center for Protein Sciences Beijing, State Key Laboratory of Proteomics, Beijing Proteome

Research Center, Beijing Institute of Lifeomics, Beijing 102206, PR China

b Research Center for Analytical Sciences, College of Sciences, Northeastern University, Shenyang  
110819, P. R. China.

\*Corresponding Author E-mail:

amy\_ljh@163.com (Li H.), zwj2004zwj@126.com (Zhang W.J.) and 13683167093@163.com (Zhang  
Y.J.)

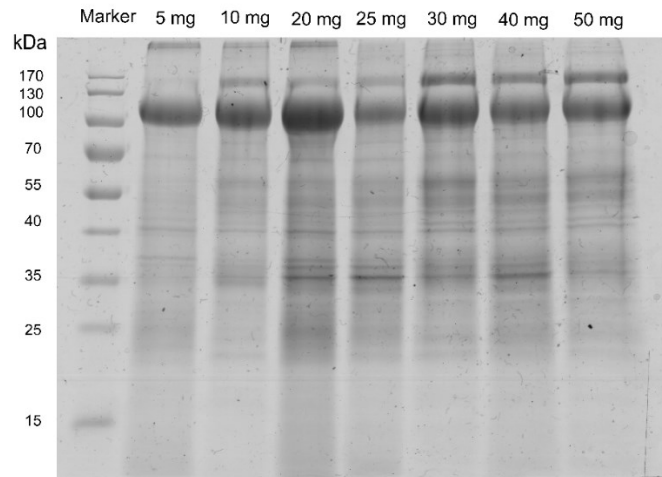

Figure S1. SDS-PAGE analysis (Coomassie Brilliant Blue stained) of the exosome protein isolated using titanium dioxide of different quantity.

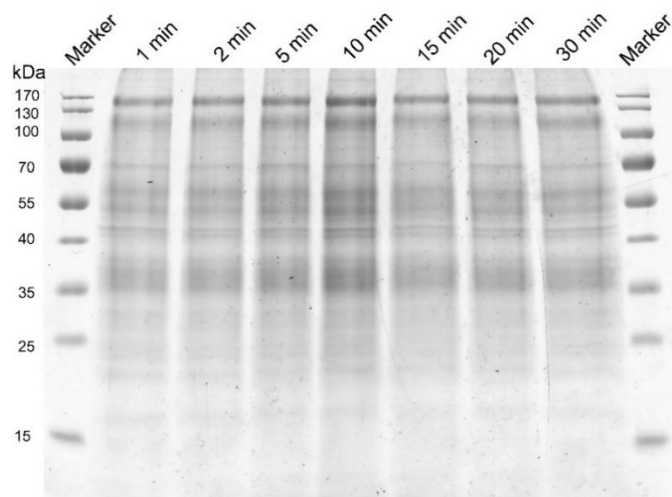

Figure S2. SDS-PAGE analysis (Coomassie Brilliant Blue stained) of the exosome protein isolated using different incubation time.

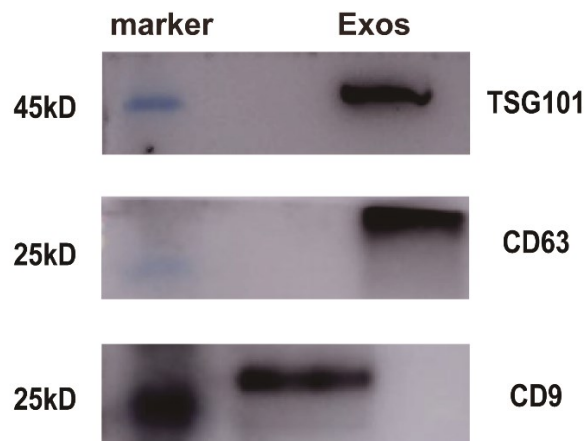

Figure S3. Western blotting analysis of urinary exosome markers (TSG101, CD9 and CD63).

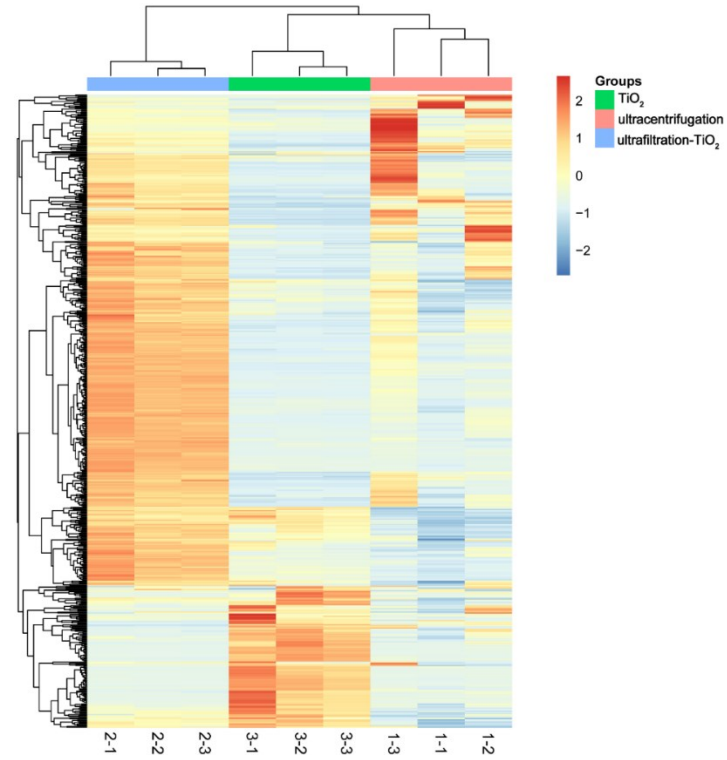

Figure S4. Heat map of proteins abundances in the urinary exosomes obtained by three methods

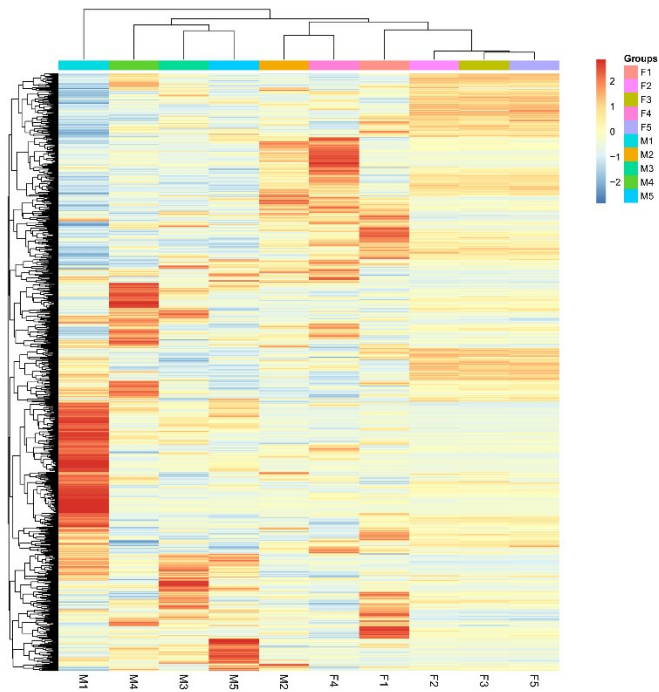

Figure S5. Hierarchical clustering of urinary exosomal proteomes from 10 individuals
